# Supplementary material for: Exploring the key anthropological drivers of and barriers to zoonotic malaria preventative behaviour in a community exposed to Plasmodium knowlesi infection in Malaysia: protocol for a qualitative study with a participatory research design
Source: PubMed Central journal article supplement — BMJ Open. 2022 Jun 30;12(6):e060866. doi: 10.1136/bmjopen-2022-060866 (PMC9247694; doi:10.1136/bmjopen-2022-060866), 2022-06-30
Supplement: bmjopen-2022-060866.draft_revisions.pdf [file bmjopen-2022-060866.draft_revisions.pdf]

# BMJ Open

BMJ Open is committed to open peer review. As part of this commitment we make the peer review history of every article we publish publicly available.

When an article is published we post the peer reviewers' comments and the authors' responses online. We also post the versions of the paper that were used during peer review. These are the versions that the peer review comments apply to.

The versions of the paper that follow are the versions that were submitted during the peer review process. They are not the versions of record or the final published versions. They should not be cited or distributed as the published version of this manuscript.

BMJ Open is an open access journal and the full, final, typeset and author-corrected version of record of the manuscript is available on our site with no access controls, subscription charges or pay-per-view fees (<http://bmjopen.bmj.com>).

If you have any questions on BMJ Open's open peer review process please email [info.bmjopen@bmj.com](mailto:info.bmjopen@bmj.com)

# BMJ Open

## A participatory study on community perspectives of zoonotic malaria (*Plasmodium knowlesi*) and malaria preventive behavior: A protocol paper

|                               |                                                                                                                                                                                                                                                                                                                                                                                                                                                                                                                                                                                                                                                             |
|-------------------------------|-------------------------------------------------------------------------------------------------------------------------------------------------------------------------------------------------------------------------------------------------------------------------------------------------------------------------------------------------------------------------------------------------------------------------------------------------------------------------------------------------------------------------------------------------------------------------------------------------------------------------------------------------------------|
| Journal:                      | <i>BMJ Open</i>                                                                                                                                                                                                                                                                                                                                                                                                                                                                                                                                                                                                                                             |
| Manuscript ID                 | bmjopen-2022-060866                                                                                                                                                                                                                                                                                                                                                                                                                                                                                                                                                                                                                                         |
| Article Type:                 | Protocol                                                                                                                                                                                                                                                                                                                                                                                                                                                                                                                                                                                                                                                    |
| Date Submitted by the Author: | 06-Jan-2022                                                                                                                                                                                                                                                                                                                                                                                                                                                                                                                                                                                                                                                 |
| Complete List of Authors:     | Naserrudin, Nurul Athirah; Universiti Kebangsaan Malaysia, Department of Community Health<br>Hod, Rozita; Universiti Kebangsaan Malaysia, Department of Community Health<br>Saffree Jeffree, Mohammad ; Universiti Malaysia Sabah, Faculty of Medicine and Health Sciences<br>Culleton, Richard; Ehime University<br>Ahmed, Kamruddin; Universiti Malaysia Sabah, Department of Pathology and Microbiology, Faculty of Medicine and Health Sciences; Universiti Malaysia Sabah, Borneo Medical and Health Research Centre, Faculty of Medicine and Health Sciences<br>Hassan, Mohd Rohaizat; Universiti Kebangsaan Malaysia, Department of Community Health |
| Keywords:                     | QUALITATIVE RESEARCH, INFECTIOUS DISEASES, Epidemiology < INFECTIOUS DISEASES, SOCIAL MEDICINE, Tropical medicine < INFECTIOUS DISEASES, Public health < INFECTIOUS DISEASES                                                                                                                                                                                                                                                                                                                                                                                                                                                                                |
|                               |                                                                                                                                                                                                                                                                                                                                                                                                                                                                                                                                                                                                                                                             |

SCHOLARONE™  
Manuscripts

1  
2  
3  
4 1 **A participatory study on community perspectives of zoonotic malaria**  
5  
6 2 **(*Plasmodium knowlesi*) and malaria preventive behavior: A protocol paper**  
7  
8  
9 3

10  
11 4 Nurul Athirah Naserrudin<sup>1,3</sup> Rozita Hod<sup>1</sup>, Muhammad Saffree Jeffree<sup>2,4</sup>, Richard Culleton<sup>6</sup>,  
12  
13 5 Kamruddin Ahmed<sup>2,5</sup> and Mohd Rohaizat Hassan<sup>1</sup>  
14

15 6 <sup>1</sup> Department of Community Health, Faculty of Medicine, Universiti Kebangsaan Malaysia, Cheras,  
16  
17 7 Kuala Lumpur, Malaysia  
18

19 8 <sup>2</sup> Borneo Medical and Health Research Centre, Faculty of Medicine and Health Sciences, Universiti  
20  
21 9 Malaysia, Sabah, Kota Kinabalu, Malaysia  
22

23  
24 10 <sup>3</sup> Sabah State Health Department, Ministry of Health, Kota Kinabalu, Malaysia  
25

26 11 <sup>4</sup> Department of Community and Family Medicine, Faculty of Medicine and Health Sciences,  
27  
28 12 Universiti Malaysia Sabah, Kota Kinabalu, Malaysia  
29

30 13 <sup>5</sup> Department of Pathobiology and Medical Diagnostics, Faculty of Medicine and Health Sciences,  
31  
32 14 Universiti Malaysia Sabah, Kota Kinabalu, Malaysia  
33

34 15 <sup>6</sup> Division of Molecular Parasitology, Proteo-Science Centre, Ehime University, Japan  
35  
36  
37 16

38  
39 17 Corresponding author:

40  
41 18 Mohd Rohaizat Hassan  
42

43 19 Department of Community Health, Faculty of Medicine, Universiti Kebangsaan Malaysia, 56000  
44  
45 20 Cheras, Kuala Lumpur, Malaysia  
46

47 21 Email: [rohaizat@ppukm.um.edu.my](mailto:rohaizat@ppukm.um.edu.my)  
48  
49 22

50  
51 23 **Keywords:** *Plasmodium knowlesi*, Participatory research, Photovoice, Focus group  
52  
53 24 discussion, In-depth interview, Exploratory study, Malaria, Preventive behavior  
54  
55

56 25 **Word count :** 4262  
57  
58  
59 26  
60

## Abstract

**Introduction:** *Plasmodium knowlesi* malaria is a zoonotic mosquito-borne disease with complex epidemiology. We describe a participatory research (PR) design for a study aimed at exploring the social context and malaria preventive behavior of communities exposed to *P. knowlesi* malaria. According to the World Health Organization (WHO), the prevention and control of vector-borne diseases requires community participation to increase the coherence between malaria interventions and sustaining the public health programs.

**Methods:** The PR will be conducted over a period of 12 months, from March 2022 to March 2023, among adults (>18 years old) who are permanent residents in a rural village exposed to *P. knowlesi* malaria in Sabah, Malaysia. We will select patients who were diagnosed with *P. knowlesi* infection within January to December 2021 for the focus group discussion (FGD), as they can provide perspectives on disease from the point of view of those previously diagnosed with infection. In-depth interviews (IDI) with people of importance in the community, such as the head of the village will also be conducted. Both FGD and IDI will be conducted from March 2022 until June 2022. Concurrently, a photovoice with adults over 18 years old who reside in the community will be conducted. All participants will provide consent prior to participation. We will use a study framework as a theoretical lens to guide the exploration of the beliefs, social contexts, barriers, and drivers surrounding zoonotic malaria preventive behavior.

**Discussion:** The participatory approach can facilitate policymakers in designing future zoonotic malaria control programs by investigating the community perspectives and concerns about zoonotic malaria from a local context.

**Ethical and dissemination:** The study has ethical approval by NMRR/MREC and Universiti Kebangsaan Malaysia Research.. The results will be published in international peer-reviewed journals and presented at conferences and other platforms.

### Strengths and limitations of the study

- The participatory approach protocol is geared toward conducting a research process with the adult > 18 years old in communities exposed to *P. knowlesi* malaria in Sabah, Malaysia to facilitate policymakers in designing future zoonotic malaria control programs
- The PR method will use a theoretical framework that integrates three models as a lens to guide the study
- The PR aims to create collaboration between researchers and participants, answer specific research questions, facilitate communication, and enable knowledge acquisition in a natural setting
- The study will use a participatory approach to explore the challenges of the communities to practise malaria preventive behaviour against zoonotic malaria in their local settings
- To build trust with participants, researchers require sufficient time, competencies, skills, and a high degree of flexibility and reflexivity throughout the study

## 68 Introduction

69 Since 2020, the World Health Organization (WHO) has included *Plasmodium knowlesi*  
70 malaria in its World Malaria Report [1]. The increasing incidence of *P. knowlesi* malaria  
71 among humans is a public health concern [1]. Malaria generally affects poor communities  
72 with low levels of education and limited access to health services [1, 2]. Individuals working  
73 as planters, farmers, or agricultural workers who may come into contact with macaques and  
74 *Anopheles* mosquitoes are at risk of *P. knowlesi* malaria [3-5]. Ecological changes due to  
75 deforestation and other anthropogenic activities increase the risk of zoonotic malaria [3-5].  
76 Adults males are typically at higher risk than women and children, in particular individuals  
77 who work in or visit forested areas [2, 5].

78 Vector control measures such as insecticide-treated nets (ITNs) and long-lasting  
79 insecticide nets (LLINs) are used to control the incidence of malaria [1-6]. However, the  
80 suitability of preventive measures such as protective clothing and bednets was perceived as  
81 "uncomfortable" by individuals who worked in the forest [7]. Close proximity housing to the  
82 forest increases the exposure of women and children to zoonotic malaria infection, leading  
83 to their asymptomatic carriage of *P. knowlesi* malaria parasites [5]. Further research that  
84 focuses on human behavioral factors that contribute to disease transmission is warranted [5,  
85 8].

### 87 Malaria control strategy: socio-context and human behavior

88 Based on the UNDP/World Bank/WHO Special Programme for Research and Training in  
89 Tropical Diseases (TDR), understanding the behavior of members of a community and its  
90 socio-contexts can inform preventive measures [2]. People have difficulty understanding the  
91 complexity of the epidemiology of zoonotic malaria [3, 12]. Quantitative surveys often fail to  
92 account for the underlying causes of human behavior [8], and social contexts such as lifestyle,

1  
2  
3 93 socio-cultural belief, economic factors, and behavioral factors can influence malaria exposure  
4  
5  
6 94 and usage of preventive measures [7-11], social gatherings and activities before bedtime  
7  
8 95 increase the risk of mosquito bites [9]. Furthermore, ITNs are not effective when communities  
9  
10 96 do not use them properly [7, 9]. In addition, cultural and economic activities also affect the  
11  
12 97 acceptance and usage of malaria preventive measures [7, 9], and can influence health-  
13  
14 98 seeking behaviors and compliance with preventive measures [2]. Malaria exposure is highest  
15  
16  
17 99 for communities living in rural areas, and low-income households [1, 2], and these high risk  
18  
19 100 and marginalised communities require urgent complementary antimalarial measures that  
20  
21  
22 101 help them to avoid outdoor biting mosquitoes [2, 6].

23  
24 102 Numerous previous studies have been conducted on local beliefs concerning illness  
25  
26 103 in different regions of the world [2, 7, 10]. In Indonesia, belief in a supernatural cause of  
27  
28  
29 104 malaria influences individuals to consume certain foods, use pendants, and "*jampi*" (magic).  
30  
31 105 They apply these measures rather than implementing evidence-based antimalarial measures  
32  
33 106 or seeking treatment at healthcare centers [7]. Individuals seek treatment with traditional  
34  
35  
36 107 practitioners because of cost, and claim that these are more effective and reliable [2, 7].

37  
38 108 Studies from Africa, Indonesia and the Philippines suggest that cultural and religious  
39  
40 109 beliefs influence understandings of the causation of malaria [2, 7, 9]. These beliefs impact on  
41  
42 110 adherence to bednet usage and influence attitudes towards health seeking behavior [2, 7].  
43  
44  
45 111 Understanding how communities perceive malaria and preventive measures such as bednet  
46  
47 112 compliance can inform future malaria control programs [2, 6]. Along with understanding  
48  
49 113 community behavior, existing traditional knowledge should also be assessed prior to the  
50  
51  
52 114 design and implementation of malaria control strategies. For a program to be sustainable, the  
53  
54 115 community should be involved in its planning, implementation, and evaluation [2, 6]. Rather  
55  
56 116 than focusing on the individual, community empowerment helps to increase the sustainability  
57  
58  
59 117 of interventions [2, 6]. As one of the pillars of a multisectoral approach to vector borne disease  
60

1  
2  
3 118 control, community participation is a powerful component that is cost-effective, practical, and  
4  
5  
6 119 facilitates behavioral changes that focus on enhanced vector control measures [6].  
7

8 120 The failures of "one size fits all" strategies for malaria control have prompted a re-  
9  
10 121 evaluation of the importance of communities' local priorities and needs [2, 6]. For example,  
11  
12 122 participatory research approaches can be used to explore the influence of social context on  
13  
14  
15 123 the surrounding environment as well as community behaviors that increase exposure to  
16  
17 124 zoonotic malaria. It is crucial to investigate and explore opportunities for improving malaria  
18  
19 125 disease control. This will assist acceptance in local communities [6].  
20

21  
22 126 Participatory research (PR), also known as 'community-based PR' and 'community  
23  
24 127 research' [11] is a collaborative and iterative research design involving input from researchers  
25  
26 128 and participants. It focuses on research processes that involve local people. PR incorporates  
27  
28  
29 129 community perspectives and emphasises the direct engagement of local priorities [11]. PR  
30  
31 130 differs from participatory action research (PAR) by shifting the emphasis from action and  
32  
33 131 changing to collaborative research activities [11]. PR aims to produce knowledge in  
34  
35  
36 132 collaboration between researchers and participants. This can lead to new insights [11]. The  
37  
38 133 advantage of PR is that researchers can conduct systematic inquiries with participants to  
39  
40 134 gather local knowledge and experience from those who are immediately affected by the  
41  
42 135 ongoing issues [11]. This approach provides findings that may facilitate social change, and  
43  
44  
45 136 these changes can then be translated into action [11].  
46  
47 137  
48

### 49 138 **The characteristics of the participatory approach**

50  
51 139 Discrete differences exist between PR and other research methodologies [11]. For example,  
52  
53  
54 140 in PR studies, power lies with the participants. It emphasises a "bottom-up" approach by  
55  
56 141 incorporating local knowledge in future planning and program implementation [11]. In  
57  
58 142 contrast, other research designs often aim to generate knowledge from research without  
59  
60



1  
2  
3 143 incorporating local priorities and perspectives. This oversight may result in inappropriate  
4  
5  
6 144 recommendations [11]. PR is an alternative approach for empowering, engaging, and  
7  
8 145 creating a cohesive and sustainable vector control program. Such a program addresses local  
9  
10 146 issues. Below we describe the methods that will be used and the analyses that will be  
11  
12  
13 147 conducted in this study.

14  
15  
16 148

### 17 18 149 **Study perspective and health behavior model**

19  
20 150 From a constructivist perspective, the meaning and experience of phenomena are socially  
21  
22  
23 151 constructed, for example by social norms, beliefs, and environment, rather than inherent  
24  
25 152 within individuals. This paradigm emphasises the generation of understanding an issue "from  
26  
27 153 the bottom up" [12]. Therefore, this study seeks to incorporate an understanding of socio-  
28  
29 154 cultural contexts and their structural conditions on malaria preventative behavior among  
30  
31  
32 155 individuals and communities exposed to *P. knowlesi*. Previous studies have shown that  
33  
34 156 individuals and communities have their own native and socio-cultural beliefs toward the  
35  
36 157 disease and that these influence malaria preventive behavior [2]. There are also drivers and  
37  
38  
39 158 barriers to malaria preventative behavior in the community [2]. Participants in the study can  
40  
41 159 provide local perspectives on preventive measures [2, 7], and opinions for future  
42  
43 160 improvement of communication methods and tools to deliver preventative messages [2, 6].

44  
45  
46 161

### 47 48 162 **The study framework**

49  
50 163 The study framework will integrate the ideation model [13], the explanatory model [14], and  
51  
52 164 Murdock's illness causal model [15]. This framework will act as a theoretical lens for  
53  
54  
55 165 knowledge processing in this study. Theory can convey a clear signpost of the study and  
56  
57 166 provide guidance on how and what method will help to answer the research questions [33].  
58  
59  
60

1  
2  
3 167 The ideation model is a predictive model of behavior change involving both individuals  
4  
5  
6 168 and communities. It is a socioecological approach involving communication and behavior  
7  
8 169 change that integrates multiple theories [16, 17]. The ideation model acts as a conceptual  
9  
10 170 tool that can identify common psychosocial variables that may influence malaria related  
11  
12  
13 171 behavior [13, 16, 17]. This framework identifies a set of psychosocial variables grouped into  
14  
15 172 three domains: cognitive, social support and emotion; (i) cognitive: attitudes towards the  
16  
17 173 recommended behavior, perceived risk and self-efficacy to protect self and others; (ii)  
18  
19 174 emotional: feelings of fear relating to the condition that influences the intention of performing  
20  
21  
22 175 the behavior (iii) social: social support and peer pressure to practice or avoid the  
23  
24 176 recommended behavior and interpersonal communication with others about recommended  
25  
26 177 practices [13, 16, 17].  
27

28  
29 178 The explanatory model is a tool for medical and public health professionals to  
30  
31 179 investigate cultural variations in illness experiences, diagnosis, and treatment. The model  
32  
33 180 aids in developing rapid assessments through direct communication with patients, family  
34  
35  
36 181 members, and relatives [8, 14]. The data produced can facilitate the translation of  
37  
38 182 interventions that consider the local perceptions of illness, circumstances that result in a risk  
39  
40 183 pattern, and community structures that might support the intervention [8, 14].  
41

42 184 Murdock's illness causal model conceptualised the local perception of causation of  
43  
44  
45 185 disease [15]. According to this theory, it is important to distinguish between beliefs about  
46  
47 186 natural and supernatural causes of illness, which are diverse worldwide, as they influence  
48  
49 187 how disease treatment and behavior are perceived [10, 15]. This framework has not been  
50  
51  
52 188 applied to research on *P. knowlesi* malaria to date.  
53  
54  
55  
56  
57  
58  
59  
60

1  
2  
3  
4 189  
5  
6 190  
7  
8 191  
9  
10 192  
11  
12  
13 193  
14  
15 194  
16  
17 195  
18  
19  
20 196  
21  
22 197  
23  
24 198  
25  
26 199  
27  
28  
29 200  
30  
31 201  
32  
33 202  
34  
35  
36 203  
37  
38 204  
39  
40  
41 205  
42  
43 206  
44  
45  
46 207  
47  
48 208  
49  
50 209  
51  
52 210  
53  
54  
55 211  
56  
57 212  
58  
59 213  
60

## Study aim

This study aims to explore the key anthropological drivers of and barriers to zoonotic malaria preventative behavior among communities exposed to *P. knowlesi* infection. This study will be conducted among adults (age > 18 years old), including those with a history of *P. knowlesi* malaria infection, and those who live in areas with a high incidence of infection.

The study will address the primary research question: “According to adults (age > 18 years old), including those with past history of this infection, and live in an area exposed to *P. knowlesi* malaria infection, how and why does their beliefs towards the disease, and social, cultural and environmental challenges, underlie the zoonotic malaria preventive behavior?”. We will then translate the views of the communities into information for policymakers. Thus, addressing the other research question: “How can the views and concerns of this communities on zoonotic malaria infection and its challenges to preventive behavior can be translated into information for future *P. knowlesi* malaria control programme?”.

## Methods and analysis

### Study location

This study will be conducted in Sabah, the second largest state in Malaysia after Sarawak. It has a high incidence of *P. knowlesi* malaria [19, 20]. Sabah covers 73,904 sq km, with an estimated population of 3.90 million in 2019 [21]. Geographically, Sabah is composed of a mix of mountainous regions, coastlines, and tropical rainforests. A study by Cooper *et al.* reported five districts in Sabah with a high incidence of *P. knowlesi* malaria; Ranau, Keningau, Tenom, Tambunan, and Kota Marudu [22]. The present study will be conducted in the northern region of Sabah in Kudat region, the location of several recent studies on zoonotic malaria [3, 5, 23]. This district has a high incidence of *P. knowlesi* malaria, defined as >

1  
2  
3 214 1/1000 persons [24]. This location was selected after obtaining a list districts with village  
4  
5  
6 215 names from the Sabah State Health Department, within areas with high incidences of *P.*  
7  
8 216 *knowlesi* in 2020. (see Figure 1)  
9

## 10 217 11 12 218 **Study participants**

13  
14  
15 219 The study participants will be men and women above 18 years old who can provide informed  
16  
17 220 consent prior to the focus group discussion (FGD), in-depth interview (IDI), and photovoice.  
18  
19 221 The study will include participants who are permanent residents of the village, are mobile,  
20  
21  
22 222 without known cognitive or mental health issues, and are able to answer questions in Malay  
23  
24 223 or English. Due to restrictions imposed by the current COVID-19 pandemic, participants with  
25  
26 224 access to electronic communication tools will be preferred [25, 26]. The sampling method for  
27  
28  
29 225 the FGD will be purposive sampling among individuals who were previously diagnosed with  
30  
31 226 *P. knowlesi* infection between January 2021 and December 2021. It will consider the need to  
32  
33 227 conduct discussions *via* electronic communication if there are restrictions against direct  
34  
35  
36 228 fieldwork. Community leaders will be selected for IDI. Subsequently, a snowballing technique  
37  
38 229 will be used to recruit other information-rich individuals. The FGD and IDI method is planned  
39  
40 230 for the four months from March 2022 through to June 2022. For the photovoice, a recruitment  
41  
42 231 pamphlet will be distributed in the village, and we will use purposive sampling to recruit the  
43  
44  
45 232 participants. Similar to the FGD, individuals with good electronic connectivity will be preferred  
46  
47 233 in order to facilitate remote discussions in adherence with COVID-19 restrictions. Excluded  
48  
49 234 from the study will be non-residents, people with known cognitive or mental health issues,  
50  
51  
52 235 and those who are unable to attend interviews or FDGs after two invites. All these methods  
53  
54 236 will be conducted concurrently (between March and June 2022).  
55  
56 237  
57  
58  
59  
60

1  
2  
3 **238 Sample size**  
4

5  
6 239 For FGDs, 8 to 10 participants will be enrolled [27], while IDI may be up to 12 participants  
7  
8 240 [28]. Data will be collected until data saturation is reached [27-29]. To maintain homogeneity  
9  
10 241 of the FGD groups, participants will be stratified into gender and age-specific groups [27]. For  
11  
12 242 example, males and females over 18 years old will be in different FGD groups to males and  
13  
14 243 females over 65 years old. Earlier studies using photovoice methods reported enrolling four  
15  
16  
17 244 and up to 122 participants [30]. We aim to recruit 10 to 15 participants.  
18  
19  
20

21  
22 **246 Categorisation of participation**  
23

24 247 The gradation of participation in this study is informed by Arnstein's categorisation, termed a  
25  
26 248 "ladder of citizen participation" [31]. This ladder distinguishes three main participation  
27  
28  
29 249 categories: citizen power, tokenism, and non-participation; and eight levels: manipulation,  
30  
31 250 therapy, informing, consultation, placation, partnership, delegated power, and client control  
32  
33 251 [31]. We will utilise tokenism in our study. During the FGD, IDI, and photovoice methods, we  
34  
35  
36 252 will ensure that communication between researchers and participants allows them the  
37  
38 253 opportunity to influence the decisions [31]. To ensure meaningful "tokenism" between  
39  
40 254 researchers and participants in the photovoice method, we will provide a training workshop  
41  
42 255 and an introduction prior to commencing. The workshop will ensure a safe working  
43  
44  
45 256 environment, and agreements will be reached between the researchers and participants [32,  
46  
47 257 33]. During the photovoice progress, we will regularly discuss the conditions for cooperation  
48  
49 258 with the participants. The research questions will be shared with participants [32-34]. We will  
50  
51  
52 259 communicate in a clear manner in the Malay language and tailor communication to the  
53  
54 260 literacy and coping level of the participants. The participants will receive a "token" for  
55  
56 261 participating in the study. Participants will have the right to withdraw from the study at any  
57  
58  
59 262 point.  
60

## Study design

The study is a multimethod design using the PR approach. This study will be conducted over a 12 months period. The study will use FGD, IDI, and the photovoice method, which offers the advantage of triangulating the data (Figure 2). The views of individuals above 18 years old will be compared and interpreted with participants with a history of *P. knowlesi* infection. The photovoice method will raise their concerns using an iterative and collaborative process. Due to the COVID-19 pandemic, research methods may be modified to accommodate social distancing requirements [25, 26].

The study will have semi-structured interview guides. Rapport will be established with individuals so that topics can be freely discussed. Lastly, the study will use a participatory visual method (PVM); the photovoice. The researchers' role will be to introduce the research, the technique of photography, create a dialogue with participants (co-researchers), and conduct an exhibition or otherwise share the results with policymakers [32, 33].

## The study phases

### Phase 1: Preparation

The first phase of the study is to conduct a systematic literature review to understand: i) the behavior or activities that expose humans to *P. knowlesi* infection, and ii) how data on behavior were collected in previous studies. The literature searched was from standard scientific databases. The article abstracts were screened and assessed by three researchers, and any disagreement on the quality of the studies was resolved by consensus. The Joanna Briggs Institute critical appraisal checklist was used to rate the quality of the studies. A gray literature search was also performed from the WHO website.

The next step was to develop a research framework that would function as the theoretical lens for this study. The theoretical lens is the study's assumptions that will guide

1  
2  
3 288 the study methodology. This framework focused on factors that possibly influence malaria  
4  
5  
6 289 preventative behavior. The third stage will be selection of participants. A pamphlet will be  
7  
8 290 distributed in the village to recruit participants for the photovoice project. Only those  
9  
10 291 individuals who show interest and match our eligibility criteria will be recruited. The  
11  
12 292 photovoice participants will attend a workshop introducing the study, discussing ethical  
13  
14  
15 293 considerations, distributing tasks, and outlining responsibilities. Participation will continue  
16  
17 294 throughout the study duration.

18  
19 295  
20

### 21 **Phase 2: Implementation of the study**

22 296  
23  
24 297 The implementation of the study is as follows: FGD and IDIs will be conducted with  
25  
26 298 participants to answer the specific research questions. Participants will participate in  
27  
28  
29 299 discussions and undergo an interview using the research questions as a guide. Data will be  
30  
31 300 collected and analysed by the research team. Both FGD and IDIs will be recorded,  
32  
33 301 transcribed *verbatim* by the research team, and analysed using thematic analysis [35]. We  
34  
35 302 will use the qualitative software program ATLAS.Ti Version 9.

36  
37  
38 303 The FGD and IDI will be performed in a place familiar to the participants. The FGD will  
39  
40 304 start with a general question about what participants perceive about *P. knowlesi* infection,  
41  
42 305 explore their beliefs concerning illness causation, and how and why these beliefs influence  
43  
44  
45 306 their malaria-preventative behavior. Prompts will also be used to gather information and to  
46  
47 307 generate the codes and themes. The FGD will be conducted for approximately 90 minutes,  
48  
49 308 preferably without breaks [27]. The session will continue until a clear pattern emerges and  
50  
51  
52 309 subsequent groups do not produce new information [27-29]. Semi-structured, in-depth  
53  
54 310 interviews will be conducted individually using an interview guide. Potential key informants,  
55  
56 311 such as people of influence in the community [36], such as the head of village and faith

57  
58  
59  
60



1  
2  
3 312 leaders will be contacted by formal letter. A meeting will be arranged with this gatekeeper to  
4  
5  
6 313 build rapport and to request permission to conduct the study at the site [37].  
7

8 314 Face-to-face interviews or modified interviews may be conducted using electronic  
9  
10 315 communication depending on the COVID-19 situation. The duration of the interview will be  
11  
12 316 approximately 60-90 minutes [27]. The session will be written and recorded. As a means to  
13  
14  
15 317 maintain trustworthiness, member-checking and external coding will be used to validate the  
16  
17 318 interpretation and coding [38]. Interviews will continue until data saturation is reached [27-  
18  
19 319 29].  
20

21  
22 320 In the photovoice method, participants will take photographs, discuss them through  
23  
24 321 the FGD method, and select the photos that best reflects the community [39-42]. Photovoice  
25  
26 322 research teams will work as closely as possible with the local structures and institutions to  
27  
28  
29 323 facilitate meaningful long-term participation. The goals, strategies, and limitations for social  
30  
31 324 change will be clearly and realistically defined and communicated to avoid raising the  
32  
33 325 expectations of participants [41, 42]. The participants will have specific rules; such as prior  
34  
35 326 consent before taking pictures of adults and avoiding pictures of children. A WhatsApp group  
36  
37  
38 327 will be created by the researchers through which the participants will be encouraged to share  
39  
40 328 the photos. The photographs taken by the participants, that will be shared with policymakers  
41  
42 329 and the public, have value in that they provide the opportunity for virtual display when words  
43  
44  
45 330 are difficult to express their views [24, 25, 32, 33]. Previous research suggests that  
46  
47 331 participants take an average of 50 photos each [42]. We will recommend 10 photos per  
48  
49 332 participant. The photographs can be taken anywhere, such as the home, street, or other  
50  
51  
52 333 aspects of the participant's environment, target actions, places, and situations [24, 25, 32,  
53  
54 334 33, 39]. We will use the SHOWED algorithm to reveal the participants' reflections of their  
55  
56 335 photos [32]. The narrative caption of the photos will reveal meaningful experiences that can  
57  
58 336 improve awareness of relevant issues [32, 33, 39].  
59  
60



1  
2  
3 337  
4  
5  
6 338  
7  
8 339  
9  
10 340  
11  
12 341  
13  
14  
15 342  
16  
17 343  
18  
19 344  
20  
21  
22 345  
23  
24 346  
25  
26 347  
27  
28  
29 348  
30  
31 349  
32  
33 350  
34  
35 351  
36  
37  
38 352  
39  
40 353  
41  
42 354  
43  
44  
45 355  
46  
47 356  
48  
49 357  
50  
51  
52 358  
53  
54 359  
55  
56 360  
57  
58 361  
59  
60

### ***Phase 3: Dissemination***

Due to the ongoing COVID-19 epidemic and resulting restrictions, we will look for opportunities to present the research findings on appropriate platforms, apart from the photos produced in the photovoice study, which will be exhibited [39]. Thus, dissemination will be through online research presentations, various scientific presentations, and a book [39]. The book will include coloured photos and narratives from participants that illustrate their perspectives on local beliefs, and the drivers and barriers to malaria preventative behavior. All the photovoice participants, including those that contribute photos will be given an opportunity to review the initial draft. Hardcopies will be disseminated to policymakers (for example the Sabah state health department).

### **Supervisory committee**

The supervisory committee will monitor the study process, from initiation to the end of the study, and provide advice on the content of the study and its appropriateness with respect to the study aims. Monthly meetings are planned, and members of the supervisory committee will be asked for further input, if needed. Researchers and stakeholders will be a part of this supervisory committee.

### **Patients and public involvement**

Participants were not directly involved in the study design. However, the snowballing technique will involve the recruited participants, in which the participants of the FGD and IDI will only act as research participants, and the participants in photovoice will conduct the photography session, give inputs in analysis, and participate in the exhibition. The researchers will conduct the final reporting and dissemination plan of this research.

## Data analysis

Data will be collected by the researcher and research assistants (RAs) proficient in the local language. The RA will be trained by senior researchers (public health specialists and anthropologists) and will be the observers, notetakers and translators. The RA will assist in transcribing the data from the local language into English. The data will be exported into ATLAS.Ti software Version 9 to facilitate data analysis.

## Thematic analysis

Thematic analysis will be used to generate codes and themes from the data [35, 43]. Data familiarisation will be through re-reading the transcripts. Initial codes will be generated systematically across the whole data set. Themes will be identified within codes, and these themes will be named and defined. Prior to the writeup, a review of the themes will be conducted [35, 43].

## Rigor and data trustworthiness

Rigor is defined as the demonstration of integrity and competence within a study [44]. Data trustworthiness will be gained through feedback from participants (credibility, dependability), checks by participants and policymakers (confirmability), and a thorough description of data collection and analysis (transferability) [38]. Member-checking will be performed after all sessions of the chosen methods are completed [38]. For example, after an IDI session is completed, a summary will be given to participants to confirm or comment on the researcher's understanding throughout the session, and to maintain data accuracy. It will provide the opportunity to modify errors or wrong interpretations [38]. External coding will increase the validity of the data.[38] The coding process will be individually applied to the IDI, FGD, and

1  
2  
3 387 photovoice data. The data will be triangulated to answer the research questions (RQs); and  
4  
5  
6 388 the interpretation of the data will be enriched by triangulation, as well as by creating new  
7  
8 389 themes [35, 43].  
9

10 390  
11

## 12 391 **Reflexivity of the researcher**

13  
14  
15 392 Reflexivity and subjectivity are important characteristics of qualitative studies using thematic  
16  
17 393 analyses [35, 43]. The PR method encourages a self-reflective, engaged, and self-critical role  
18  
19 394 among researchers [11]. The primary investigator (PI) in this study has 10 years of experience  
20  
21  
22 395 of working as a primary care medical practitioner in a rural district in Sabah, Malaysia. The  
23  
24 396 PI will be the "facilitator" or "moderator" to guide the discussion between participants [27, 37].  
25

26 397  
27

## 28 398 **The study outcome**

29  
30  
31 399 Community participation in research is critical for developing information, education, and  
32  
33 400 communication tools to produce and promote public health programmes [11]. The views and  
34  
35 401 reflections of the community in the study are relevant for culturally sensitive and effective  
36  
37  
38 402 future malaria-intervention programs, and could result in sustained malaria interventions [6].  
39  
40 403 The outcome of this study will be used to inform the development of community-friendly and  
41  
42 404 appropriate communication tools [6]. This approach is viewed as an essential component of  
43  
44  
45 405 ethical good practice in research. It brings community health benefits by increasing the  
46  
47 406 chances of success of an intervention [2, 6]. Intervention can be in the form of education,  
48  
49 407 reflection, and discussion [6, 41, 42].  
50

51 408  
52

## 53 409 **Discussion**

54  
55  
56 410 Efforts have been made to assess how PR can be an effective research methodology for  
57  
58  
59 411 malaria intervention. A PR project contributed to increasing knowledge and awareness on  
60

1  
2  
3 412 malaria in the community in the Philippines [24]. Many previous programs have failed  
4  
5  
6 413 because of a lack of genuine community participation and also of recognition of community  
7  
8 414 perceptions of illness and prevention [6]. Engaging communities has improved  
9  
10 415 communication tools for the promotion of effective and sustainable interventions, enhanced  
11  
12  
13 416 their relevance and feasibility, and improved data utilisation by all stakeholders [6]. We hope  
14  
15 417 to provide empirical evidence to help develop future zoonotic malaria control programs.  
16  
17 418 Community engagement and feedback in our research will increase the reliability and validity  
18  
19 419 of the study through local knowledge and theory based on experiences [2, 6, 33]. Participants  
20  
21  
22 420 will be empowered when their views and voices are heard [32, 33, 39]. Future studies and  
23  
24 421 collaborations that combine PR and emphasise community participation will reinforce  
25  
26 422 additional knowledge and appropriate behavior changes [41].  
27  
28  
29 423

### 30 31 424 **Study limitation**

32  
33 425 It is possible that, we may encounter a lack of trust among community members with the  
34  
35  
36 426 study, due to the limitation of time and space to engage with the whole community members  
37  
38 427 due to the current COVID-19 pandemic. We will attempt to minimise this by establishing trust  
39  
40 428 through early communication and engagement with the head of the village. Community  
41  
42 429 members may be sceptical about participating in the study in case their opinions are  
43  
44  
45 430 considered invalid, thus a poor response rate in certain phases of this study may be  
46  
47 431 encountered. A qualitative study is not a generalisable design but has the potential to develop  
48  
49 432 an in-depth understanding of the community from a small number of participants. Due to  
50  
51  
52 433 differences in overall philosophy, assumptions, beliefs, decision-making, and values, conflicts  
53  
54 434 can arise between study members and different organisations.  
55  
56 435  
57  
58  
59  
60

## Conclusion

The PR has important implications for the sustainability and appropriateness of malaria interventions. The PR provides insights from local people to improve the quality of research and ensure validity. The use of PR in health research promises far-reaching changes. Changing the relationship between researchers and those who participate in the research involves a transformation of power and views of the issues that provokes a more flexible and reflexive process among researchers.

## Ethical approval

This study has been approved by the Medical Research and Ethics Committee Ministry of Health Malaysia (NMRR ID-21-01980-JEH), and the Research and Innovation Secretariat, Faculty of Medicine, Universiti Kebangsaan Malaysia (FF-2021-462).

## Acknowledgements

The writing of this protocol was made possible by input from various experts. For their positive and constructive critiques, we would like to thank Prof. Douglas Storey and Dr April Monroe from the John Hopkins Center for Communication Studies; Dr Gill Black from the Sustainable Livelihoods Foundation (SLF); Dr Jeffrey Hii from the Malaria Consortium, Mahidol University, Thailand; Prof Kalsom Kayat from Universiti Utara Malaysia; Prof Lenore Manderson from the School of Public Health, University of the Witwatersrand and the Monkeybar project. We are truly grateful to both Dr Janet Cox-Singh from the University of St Andrews and Dr Cyrus Daneshvar from Plymouth Hospitals NHS; for their sharing of expert advice and experiences during their early years conducting malaria studies in Sarawak, Malaysia.

## Funding

This study received funding from Universiti Kebangsaan Malaysia grant FF-2021-462.

### Author contributions

NAN was the principal investigator responsible for the design of the study and study protocol. MRH was the coordinating investigator. RC, MSJ, RH, KA, and MRH contributed equally to the content of the study protocol with important intellectual revisions. NAN drafted the manuscript. All authors read and approved the final protocol manuscript.

### Conflicts of interest

There are no conflicts of interest associated with this protocol.

### References

1. World Health Organization (WHO). World Malaria Report: 20 Years of Global Progress and Challenges. Geneva: World Health Organization; 2020.
2. Heggengougen HK, Hackethal V, Vivek P. The behavioural and social aspects of malaria and its control: an introduction and annotated bibliography. UNDP/World Bank/World Heal Organ Spec Program Res Train Trop Dis. 2003. doi:10.3366/jqs.2013.0113
3. Manin BO, Ferguson HM, Vythilingam I, Fornace K, William T, Torr SJ, et al. Investigating the contribution of peri-domestic transmission to risk of zoonotic malaria infection in humans. PLoS Negl Trop Dis. 2016;10(10):e0005064.
4. Shearer FM, Huang Z, Weiss DJ, Wiebe A, Gibson HS, Battle KE, et al. Estimating geographical variation in the risk of zoonotic Plasmodium knowlesi infection in countries eliminating malaria. PLoS Negl Trop Dis. 2016;10(8):e00049151.
5. Fornace KM, Brock PM, Abidin TR, Grignard L, Herman LS, Chua TH, et al. Environmental risk factors and exposure to the zoonotic malaria parasite Plasmodium knowlesi across northern Sabah, Malaysia: a population-based cross-sectional survey. Lancet Planet Heal. 2019;3(4):e179–86.

- 1  
2  
3 486 6. World Health Organization (WHO). Multisectoral approach to the prevention and  
4 control of vector-borne diseases. Geneva: World Health Organization; 2020.
- 5  
6 487  
7  
8 488 7. Ekawati LL, Johnson KC, Jacobson JO, Cueto CA, Zarlinda I, Elyazar IR, et al.  
9 Defining malaria risks among forest workers in Aceh, Indonesia: a formative  
10 489 assessment. *Malar J.* 2020;19(1):1–14.
- 11  
12  
13 490  
14  
15 491 8. Manderson L, Cartwright E, Hardon, Anita E. *Handbook of Medical Anthropology*. The  
16 Routledge; 2016.
- 17 492  
18  
19 493 9. Finda MF, Moshi IR, Monroe A, Limwagu AJ, Nyoni AP, Swai JK, et al. Linking human  
20 behaviours and malaria vector biting risk in south-eastern Tanzania. *PLoS One.*  
21 2019;14(6):1–23.
- 22 494  
23  
24 495  
25  
26 496 10. Kamat VR. 'I thought it was only ordinary fever!' cultural knowledge and the  
27 micropolitics of therapy seeking for childhood febrile illness in Tanzania. *Soc Sci Med.*  
28 2006;62(12):2945–59.
- 29 497  
30  
31 498  
32  
33 499 11. Cornwall A, Rachel J. What is participatory research? *Soc Sci Med.* 1995;41:1667–  
34 74.
- 35 500  
36  
37  
38 501 12. Creswell JW, Plano-Clark VL. *Designing and conducting mixed methods research*.  
39 Thousand Oaks: Sage Publications; 2018.
- 40 502  
41  
42 503 13. Health Communication Capacity Collaborative (HC3). *Ideation - An HC3 Research*  
43 *Primer*. Balt HC3 John Hopkins Cent Commun Program; 2014.
- 44  
45 504  
46  
47 505 14. Kleinman A. Concepts and a model for the comparison of medical systems as cultural  
48 systems. *Soc Sci Med.* 1978;12:85–93.
- 49 506  
50  
51  
52 507 15. Murdock GP, Wilson SF, Frederick V. World distribution of theories of illness.  
53 *Ethnology* 1978;17(1-2):449–70.
- 54 508  
55  
56 509 16. Kincaid DL. Social networks, ideation, and contraceptive behavior in Bangladesh: a  
57 longitudinal analysis. *Soc Sci Med* 2000;50(2):215–31.
- 58 510  
59  
60

- 1  
2  
3 511 17. Storey JD, Babalola SO, Ricotta EE, Fox KA, Toso M, Lewicky N, et al. Associations  
4 between ideational variables and bed net use in Madagascar, Mali, and Nigeria. BMC  
5 512 Public Health. 2018;18(1):1–15.  
6  
7  
8 513  
9  
10 514 18. Kahissay MH, Fenta TG, Boon H. Beliefs and perception of ill-health causation: a  
11 socio-cultural qualitative study in rural North-Eastern Ethiopia. BMC Public Health.  
12 515 2017;17(1):1–10.  
13  
14  
15 516  
16  
17 517 19. World Health Organization Regional Office for the Western Pacific. Expert consultation  
18 on Plasmodium knowlesi to guide malaria elimination strategies. Geneva: World  
19 518 Health Organization; 2017.  
20  
21  
22 519  
23  
24 520 20. Abeyasinghe R. Outcomes from the evidence review group on Plasmodium knowlesi.  
25 2017. [https://www.who.int/malaria/mpac/mpac-mar2017-plasmodium-knowlesi-](https://www.who.int/malaria/mpac/mpac-mar2017-plasmodium-knowlesi-presentation.pdf)  
26 521 [presentation.pdf](https://www.who.int/malaria/mpac/mpac-mar2017-plasmodium-knowlesi-presentation.pdf) (accessed 30 Nov 2020).  
27  
28  
29 522  
30  
31 523 21. Department of Statistics Malaysia. Press release: Current population estimates,  
32 Malaysia, 2018-2019. Putrajaya: Department of Statistics Malaysia; 2019.  
33 524  
34  
35 525 22. Cooper DJ, Rajahram GS, William T, Jelip J, Mohammad R, Benedict J, et al.  
36 Plasmodium knowlesi Malaria in Sabah, Malaysia, 2015 – 2017: ongoing increase in  
37 incidence despite near- elimination of the human-only Plasmodium species.  
38 526 2020;70(3):2015–7.  
39  
40 527  
41  
42 528 23. Chua TH, Manin BO, Vythilingam I, Fornace K, Drakeley CJ. Effect of different habitat  
43 types on abundance and biting times of Anopheles balabacensis Baisas (Diptera:  
44 Culicidae) in Kudat district of Sabah, Malaysia. Parasit Vector. 2019;12(1), 1–13.  
45 529  
46  
47 530  
48  
49 531 24. Iskander D. Re-imaging malaria in the Philippines: How photovoice can help to re-  
50 imagine malaria. Malar J. 2015;14(1):1–12.  
51  
52 532  
53  
54 533 25. Malka M. Photovoice as a creative coping tool with the COVID-19 crisis in practical  
55 training seminar for social work students. Qual Soc Work. 2021;20(1-2):544–52.  
56 534  
57  
58 535  
59  
60



- 1  
2  
3 536 26. Dodds S, Hess AC. Adapting research methodology during COVID-19: lessons for  
4  
5  
6 537 transformative service research. *J Serv Manag*. 2020;32:203–17.  
7  
8 538 27. Khan M, Manderson L. Focus groups in tropical diseases research. *Health Policy Plan*.  
9  
10 539 1992;7(1):56–66.  
11  
12 540 28. Guest G, Namey E, Chen M. A simple method to assess and report thematic saturation  
13  
14  
15 541 in qualitative research. *PLoS One*. 2020;15(5):1–17.  
16  
17 542 29. Braun V, Clarke V. To saturate or not to saturate? Questioning data saturation as a  
18  
19 543 useful concept for thematic analysis and sample-size rationales. *Qual Res Sport Exerc*  
20  
21  
22 544 *Health*. 2021;13(2):201–16.  
23  
24 545 30. Hergenrather KC, Rhodes SD, Cowan CA, Bardhoshi G, Pula S. Photovoice as  
25  
26 546 community-based participatory research: a qualitative review. *Am J Health Behav*.  
27  
28  
29 547 2009;33(6):686–98.  
30  
31 548 31. Arnstein SR. A ladder of citizen participation. *J Am Plan Assoc*. 1969;35:216–24.  
32  
33 549 32. Wang C, Burris MA. Photovoice: Concept, methodology, and use for participatory  
34  
35 550 needs assessment. *Heal Educ Behav*. 1997;24:369–87.  
36  
37  
38 551 33. Catalani C, Minkler M. Photovoice: A review of the literature in health and public health.  
39  
40 552 *Heal Educ Behav*. 2010;37(3):424–51.  
41  
42 553 34. Chia C, Ghavifekr S, Zabidi A. Online interview tools for qualitative data collection  
43  
44  
45 554 during COVID-19 pandemic: Review of web conferencing platforms' functionality.  
46  
47 555 *Malaysian J Qual Res*. 2020;7(1):95–106.  
48  
49 556 35. Braun V, Clarke V. Using thematic analysis in psychology Virginia. *Qual Res Psychol*.  
50  
51 557 2006;2:77–101.  
52  
53  
54 558 36. Marshall MN. The key informant technique. *Fam Pract*. 1996;13(1):92–7.  
55  
56 559 37. Creswell JW, Creswell JD. Research design; qualitative, quantitative and mixed  
57  
58 560 methods approaches. *J Mater Process Technol*. 2018;1.  
59  
60

1  
2  
3  
4  
5  
6  
7  
8  
9  
10  
11  
12  
13  
14  
15  
16  
17  
18  
19  
20  
21  
22  
23  
24  
25  
26  
27  
28  
29  
30  
31  
32  
33  
34  
35  
36  
37  
38  
39  
40  
41  
42  
43  
44  
45  
46  
47  
48  
49  
50  
51  
52  
53  
54  
55  
56  
57  
58  
59  
60

- 561 38. Lincoln, Guba. Establishing trustworthiness. 1985.
- 562 39. Black GF, Davies A, Iskander D, Chambers M. Reflections on the ethics of  
563 participatory visual methods to engage communities in global health research. *Glob*  
564 *Bioeth.* 2018;29(1):22–38.
- 565 40. Halvorsrud K, Eylem O, Mooney R, Haarmans M, Bhui K. Identifying evidence of the  
566 effectiveness of photovoice: a systematic review and meta-analysis of the international  
567 healthcare literature. *J Public Health.* 2021;1–9.
- 568 41. Budig K, Diez J, Conde P, Sastre M, Hernán M, Franco M. Photovoice and  
569 empowerment: Evaluating the transformative potential of a participatory action  
570 research project. *BMC Public Health.* 2018;18(1):1–9.
- 571 42. Nykiforuk CIJ, Vallianatos H, Nieuwendyk LM. Photovoice as a method for revealing  
572 community perceptions of the built and social environment. *Int J Qual Methods.*  
573 2011;10(2):103–24.
- 574 43. Braun V, Clarke V. Can I use TA? Should I use TA? Should I not use TA? Comparing  
575 reflexive thematic analysis and other pattern-based qualitative analytic approaches.  
576 *Couns Psychother Res.* 2021;21(1):37–47.
- 577 44. Fereday J, Muir-Cochrane E. Demonstrating rigor using thematic analysis: A hybrid  
578 approach of inductive and deductive coding and theme development. *Int J Qual*  
579 *Methods.* 2006;5(1):80–92.

1  
2  
3  
4  
5  
6  
7  
8  
9  
10  
11  
12  
13  
14  
15  
16  
17  
18  
19  
20  
21  
22  
23  
24  
25  
26  
27  
28  
29  
30  
31  
32  
33  
34  
35  
36  
37  
38  
39  
40  
41  
42  
43  
44  
45  
46

**Legend:**

- Study Area
- Kudat District
- Malaysia Map

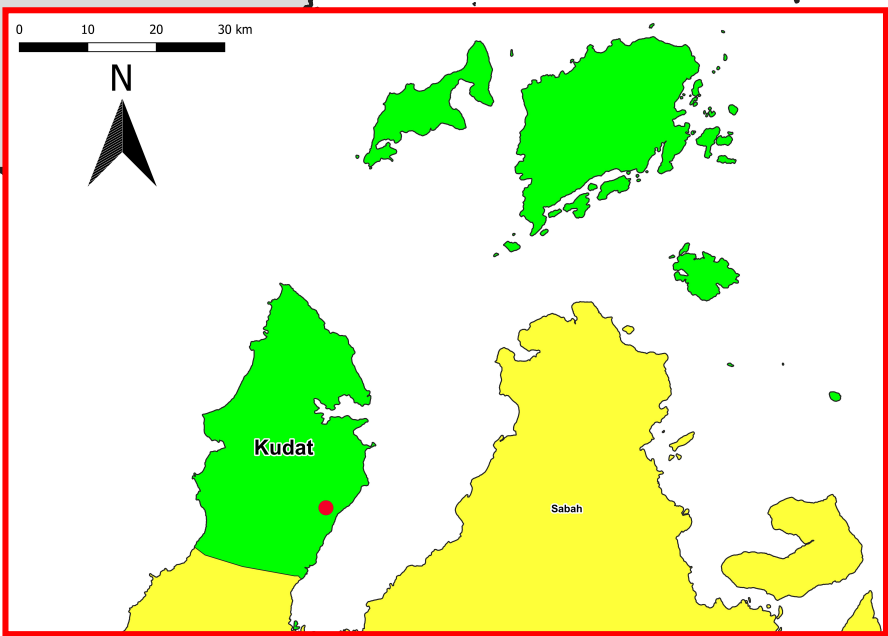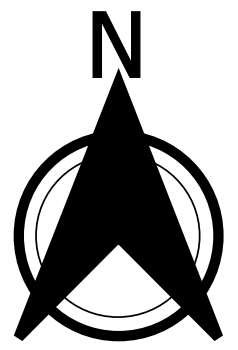

500 1,000 1,500 km

**Study aim**

To explore the beliefs and key anthropological drivers of and barriers to zoonotic malaria preventive behavior among communities exposed to *P. knowlesi* malaria infection

**Methods**

**Focus group discussion**  
(*P. knowlesi* malaria cases > 18 years old, who were diagnosed between January to December 2021)

**In-depth interview**  
(people of importance : head of village, traditional healers, etc)

**Photovoice**  
(community members > 18 years old)

**Analysis**

Thematic analysis

Thematic analysis

1. Narrative caption of photographers
2. Thematic analysis of photovoice FGD

**Result**

**Product Themes**

**Product Themes**

- Products**
1. Themes
  2. Printed documents/book
  3. Exhibition

**Discussion and conclusion**

**Study integration and inferences**

1  
2  
3  
4  
5  
6  
7  
8  
9  
10  
11  
12  
13  
14  
15  
16  
17  
18  
19  
20  
21  
22  
23  
24  
25  
26  
27  
28  
29  
30  
31  
32  
33  
34  
35  
36  
37  
38  
39  
40  
41  
42  
43  
44  
45  
46

# BMJ Open

**Exploring the key anthropological drivers of and barriers to zoonotic malaria preventative behavior in a community exposed to Plasmodium knowlesi infection in Malaysia: protocol for a qualitative study with a participatory research design**

|                                 |                                                                                                                                                                                                                                                                                                                                                                                                                                                                                                                                                                                                                                                             |
|---------------------------------|-------------------------------------------------------------------------------------------------------------------------------------------------------------------------------------------------------------------------------------------------------------------------------------------------------------------------------------------------------------------------------------------------------------------------------------------------------------------------------------------------------------------------------------------------------------------------------------------------------------------------------------------------------------|
| Journal:                        | <i>BMJ Open</i>                                                                                                                                                                                                                                                                                                                                                                                                                                                                                                                                                                                                                                             |
| Manuscript ID                   | bmjopen-2022-060866.R1                                                                                                                                                                                                                                                                                                                                                                                                                                                                                                                                                                                                                                      |
| Article Type:                   | Protocol                                                                                                                                                                                                                                                                                                                                                                                                                                                                                                                                                                                                                                                    |
| Date Submitted by the Author:   | 02-May-2022                                                                                                                                                                                                                                                                                                                                                                                                                                                                                                                                                                                                                                                 |
| Complete List of Authors:       | Naserrudin, Nurul Athirah; Universiti Kebangsaan Malaysia, Department of Community Health<br>Culleton, Richard; Ehime University<br>Hod, Rozita; Universiti Kebangsaan Malaysia, Department of Community Health<br>Saffree Jeffree, Mohammad ; Universiti Malaysia Sabah, Faculty of Medicine and Health Sciences<br>Ahmed, Kamruddin; Universiti Malaysia Sabah, Department of Pathology and Microbiology, Faculty of Medicine and Health Sciences; Universiti Malaysia Sabah, Borneo Medical and Health Research Centre, Faculty of Medicine and Health Sciences<br>Hassan, Mohd Rohaizat; Universiti Kebangsaan Malaysia, Department of Community Health |
| <b>Primary Subject Heading</b>: | Public health                                                                                                                                                                                                                                                                                                                                                                                                                                                                                                                                                                                                                                               |
| Secondary Subject Heading:      | Epidemiology                                                                                                                                                                                                                                                                                                                                                                                                                                                                                                                                                                                                                                                |
| Keywords:                       | QUALITATIVE RESEARCH, INFECTIOUS DISEASES, Epidemiology < INFECTIOUS DISEASES, SOCIAL MEDICINE, Tropical medicine < INFECTIOUS DISEASES, Public health < INFECTIOUS DISEASES                                                                                                                                                                                                                                                                                                                                                                                                                                                                                |
|                                 |                                                                                                                                                                                                                                                                                                                                                                                                                                                                                                                                                                                                                                                             |

SCHOLARONE™  
Manuscripts

1  
2  
3 1 **Exploring the key anthropological drivers of and barriers to zoonotic**  
4  
5  
6 2 **malaria preventative behavior in a community exposed to *Plasmodium***  
7  
8  
9 3 ***knowlesi* infection in Malaysia: protocol for a qualitative study with a**  
10  
11 4 **participatory research design**  
12  
13  
14 5

15  
16 6 Nurul Athirah Naserrudin<sup>1,2,3</sup>, Richard Culleton<sup>4</sup>, Rozita Hod<sup>1</sup>, Mohammad Saffree Jeffree<sup>2,5</sup>,  
17  
18 7 Kamruddin Ahmed<sup>2,6</sup> and Mohd Rohaizat Hassan<sup>1</sup>  
19  
20  
21 8

22  
23 9 <sup>1</sup> Department of Community Health, Faculty of Medicine, Universiti Kebangsaan Malaysia, Cheras,  
24  
25 10 Kuala Lumpur, Malaysia

26  
27 11 <sup>2</sup> Borneo Medical and Health Research Centre, Faculty of Medicine and Health Sciences, Universiti  
28  
29 12 Malaysia, Sabah, Kota Kinabalu, Malaysia

30  
31 13 <sup>3</sup> Sabah State Health Department, Ministry of Health, Kota Kinabalu, Malaysia

32  
33 14 <sup>4</sup> Division of Molecular Parasitology, Proteo-Science Centre, Ehime University, Japan

34  
35 15 <sup>5</sup> Department of Public Health Medicine, Faculty of Medicine and Health Sciences, Universiti  
36  
37 16 Malaysia Sabah, Kota Kinabalu, Malaysia

38  
39 17 <sup>6</sup> Department of Pathobiology and Medical Diagnostics, Faculty of Medicine and Health Sciences,  
40  
41 18 Universiti Malaysia Sabah, Kota Kinabalu, Malaysia  
42  
43  
44 19

45  
46 20 **Correspondence to:**

47  
48 21 Mohd Rohaizat Hassan

49  
50 22 Department of Community Health, Faculty of Medicine, Universiti Kebangsaan Malaysia, 56000

51  
52 23 Cheras, Kuala Lumpur, Malaysia

53  
54 24 Email: [rohaizat@ppukm.um.edu.my](mailto:rohaizat@ppukm.um.edu.my)  
55  
56  
57 25  
58  
59  
60

1  
2  
3 26 **Keywords:** *Plasmodium knowlesi* malaria, Participatory research, Photovoice, Interview,  
4  
5  
6 27 Exploratory study, Preventive behavior

7  
8 28 **Word count:** 5465  
9  
10  
11  
12  
13  
14  
15  
16  
17  
18  
19  
20  
21  
22  
23  
24  
25  
26  
27  
28  
29  
30  
31  
32  
33  
34  
35  
36  
37  
38  
39  
40  
41  
42  
43  
44  
45  
46  
47  
48  
49  
50  
51  
52  
53  
54  
55  
56  
57  
58  
59  
60

For peer review only

## ABSTRACT

**Introduction:** *Plasmodium knowlesi* malaria is a zoonotic mosquito-borne disease with complex epidemiology. According to the World Health Organization, the prevention and control of vector-borne diseases requires community participation to increase coherence between malaria interventions and sustainable public health programs. We describe a participatory research (PR) design for a study aimed at exploring the key anthropological drivers of and barriers to zoonotic malaria preventive behaviour among communities exposed to *P. knowlesi* infection in Malaysia. Participatory approaches can facilitate policymakers in designing future zoonotic malaria control programs by investigating community perspectives and concerns about zoonotic malaria in a local context.

**Methods and analysis:** The PR will be conducted over a period of 12 months, from March 2022 to March 2023, among adults (>18 years old) who are permanent residents in a rural village exposed to *P. knowlesi* malaria in Sabah, Malaysia. We will select patients who were diagnosed with *P. knowlesi* infection from January to December 2021 for focus group discussions (FGDs), as they can provide perspectives on disease from the point of view of those previously diagnosed with infection. In-depth interviews (IDIs) with people of importance in the community, such as village heads, will also be conducted. Both FGDs and IDIs will be conducted from March 2022 until June 2022. Concurrently, a photovoice with adults over 18 years old who reside in the community will be conducted. The target sample sizes for FGDs, IDIs and photovoice is 6-8, 12, and 10-15 participants, respectively. We will use a study framework as a theoretical lens to guide the exploration of the beliefs, social contexts, barriers, and drivers surrounding zoonotic malaria preventive behaviour.

**Ethics and dissemination:** This study has been approved by the Medical Research and Ethics Committee Ministry of Health Malaysia (NMRR ID-21-01980-JEH) and the Research and Innovation Secretariat, Faculty of Medicine, Universiti Kebangsaan Malaysia (FF-2021-



1  
2  
3 54 462). All participants will provide consent prior to participation The results will be reported in  
4  
5 55 international peer-reviewed journals and presented at conferences and on other platforms.  
6  
7  
8 56  
9

### 10 57 **Strengths and limitations of this study**

- 11  
12 58 • The study will use a participatory approach to explore the challenges facing communities  
13  
14 59 practicing preventive behaviour against zoonotic malaria in their local settings.  
15  
16  
17 60 • The participatory approach protocol is geared toward conducting a research process with  
18  
19 61 adults >18 years old in communities exposed to *Plasmodium knowlesi* malaria in Sabah,  
20  
21 62 Malaysia to explore their perspectives on malaria and facilitate policymakers in designing  
22  
23 63 future zoonotic malaria control programs.  
24  
25  
26 64 • The participatory research method will use a theoretical framework that has been  
27  
28 65 generated from expert consensus.  
29  
30  
31 66 • Qualitative studies are difficult to replicate in different settings and the results may not be  
32  
33 67 relevant to other communities and larger populations.  
34  
35  
36 68 • The study is time-consuming and continuous engagement is needed with all community  
37  
38 69 members in order to build trust with researchers.  
39  
40  
41  
42  
43  
44  
45  
46  
47  
48  
49  
50  
51  
52  
53  
54  
55  
56  
57  
58  
59  
60

## 70 INTRODUCTION

71 In 2020, the World Health Organization (WHO) included *Plasmodium knowlesi* (*P. knowlesi*)  
72 malaria in its World Malaria Report for the first time.[1] Since the first report of *P. knowlesi*  
73 cases in Kapit, Sarawak, Malaysia in 2004, the parasite has been reported infecting people  
74 in other countries throughout the South-East Asia region.[2, 3] The increasing incidence of  
75 *P. knowlesi* malaria among humans is a possible public health threat in the future.[3] The  
76 highest number of *P. knowlesi* cases in humans occur in Sabah and Sarawak states,  
77 Malaysian Borneo.[4] Despite positive progress towards achieving elimination of human  
78 malaria in Malaysia, the increasing incidence of *P. knowlesi* requires the application of interim  
79 strategies to reduce its transmission.[3] The threat of zoonotic malaria infection has increased  
80 dramatically, and thus it is critical to revisit current malaria control strategies and design  
81 interventions specific to zoonotic malaria.[3]

82 In Sabah state, cases of *P. knowlesi* malaria infection increased from 100 cases per  
83 year in the year 2000 to 1325 cases in 2014.[4] In 2018, there were 4131 reported *P. knowlesi*  
84 cases throughout Malaysia, with the highest incidence rate of 0.13 cases per 1000  
85 population.[4] Malaysia reported its last indigenous human malaria cases in 2017, with only  
86 85 cases.[4] *P. knowlesi* malaria cases were commonly diagnosed in adult males and  
87 persons who performed forest related work.[5] While majority of cases were uncomplicated,  
88 fatalities were reported in patients as young as 31 years old.[6] Furthermore, the detection of  
89 asymptomatic cases of *P. knowlesi* malaria in human populations, including in children and  
90 within families, suggest potential target populations for interventions.[3, 7]

91 Malaria generally affects poor communities with low levels of education and limited  
92 access to health services.[1] Individuals who may come into contact with macaques and  
93 *Anopheles* mosquitoes are at risk of *P. knowlesi* malaria.[2-10] Ecological changes due to  
94 deforestation and other anthropogenic activities increase the risk of zoonotic malaria.[8]

1  
2  
3 95 Zoonotic spillovers expose communities living in rural and semirural areas to *P. knowlesi*  
4  
5 96 malaria infection due to the destruction of the natural hosts' habitat. Macaque monkeys move  
6  
7  
8 97 father from logging activities and favour human settlements.[9] In addition, *Anopheles*  
9  
10 98 mosquito vectors from the *Leucospyrus* group prefer to breed in muddy ground pools, swamp  
11  
12 99 water and water pockets.[10] Vectors may also breed in sites like bamboo stumps, tins and  
13  
14  
15 100 other artificial containers.[10] The potential impact of this zoonotic spillover into vulnerable  
16  
17 101 communities requires interim strategies and multisectoral approaches for its prevention and  
18  
19 102 control.[7, 11]

20  
21  
22 103 In 1961, Malaysia launched its Malaria Eradication Program.[12] Various vector control  
23  
24 104 measures were introduced including indoor residual spraying (IRS) and the distribution of  
25  
26 105 insecticide treated bednets (ITNs).[12] The provision of free malaria tools has reduced human  
27  
28 106 malaria cases by 7-fold over 30 years.[4] Zoonotic malaria, however, may not be controlled  
29  
30  
31 107 to the same degree as human-restricted malaria due to the different factors that control its  
32  
33 108 transmission.[5] Exacerbating this problem, persuading the local populations to adopt  
34  
35 109 different control measures for what they perceive as the same problem is difficult. In  
36  
37  
38 110 Indonesia, for example, zoonotic-malaria specific preventive measures such as protective  
39  
40 111 clothing and bednets were perceived as "uncomfortable" by community members.[13] Among  
41  
42 112 the indigenous tribes people of Peninsular Malaysia, there is a belief that malaria has a  
43  
44  
45 113 supernatural origin, causing the community to perceive zoonotic malaria differently.[14].  
46  
47 114 Further research that explores the social context and human related factors that contribute  
48  
49 115 to disease transmission is warranted.[5]

### 50 51 52 116 53 54 117 **Malaria control strategy: socio-context and human behaviour**

55  
56 118 Based on the UNDP/World Bank/WHO Special Programme for Research and Training in  
57  
58 119 Tropical Diseases (TDR), understanding the behaviour of members of a community and its  
59  
60

1  
2  
3 120 socio-contexts can inform preventive measures.[15] Quantitative surveys often fail to account  
4  
5  
6 121 for the underlying causes of human behaviour that lead to exposure to health risks.[15, 16]  
7  
8 122 Furthermore, social contexts such as lifestyle, socio-cultural belief, economic factors, and  
9  
10 123 behavioural factors can influence malaria exposure and the usage of preventive measures.[3,  
11  
12 124 15-17] Social gatherings and other activities that are performed before bedtime can increase  
13  
14  
15 125 the risk of mosquito bites.[18-20]. Furthermore, ITNs are not effective when communities do  
16  
17 126 not use them throughout the night.[19] *P. knowlesi* vectors are typically exophagic, exophilic  
18  
19 127 and bite early during the night-time, thus indoor-based interventions are unlikely to provide  
20  
21  
22 128 sufficient protection.[10] Recently, mosquitoes of the *Umbrosus* group were found to bite  
23  
24 129 early (from 11:00 in the afternoon), thus increasing the risk to communities performing day-  
25  
26 130 time activities.[20] In addition, cultural and economic activities also affect the acceptance and  
27  
28  
29 131 usage of malaria preventive measures.[5] Farming communities and agricultural sector  
30  
31 132 workers in oil palm farm and rubber estates were non-complaint with preventive measures  
32  
33 133 due to various factors such as inconvenience and low perceive threat.[5, 13] These  
34  
35  
36 134 populations are at high risk to exposure to *P. knowlesi* malaria and thus complementary  
37  
38 135 antimalarial strategies are required.[3, 7, 21]. For example, the One Health initiatives enforce  
39  
40 136 ecological regulations that limit deforestation.[21] *P. knowlesi* malaria control measures  
41  
42 137 should integrate a transdisciplinary approaches through identification of the risks of vector-  
43  
44  
45 138 human contact during outdoor activities.[5, 7, 21]

46  
47 139 Numerous previous studies have been conducted on local beliefs concerning malaria  
48  
49 140 in different regions of the world.[14, 22-24] In Indonesia, belief in a supernatural cause of  
50  
51  
52 141 malaria influences individuals to consume certain foods and to use pendants and "*jampi*"  
53  
54 142 (magic). They apply these measures rather than implementing evidence-based antimalarial  
55  
56 143 measures or seeking treatment at healthcare centres.[13] Individuals seek treatment with  
57  
58  
59  
60

1  
2  
3 144 traditional practitioners because of cost, and claim that these are more effective and reliable.  
4  
5  
6 145 [13, 25]

7  
8 146 Studies from Malaysia, Africa, Indonesia, India and the Philippines suggest that  
9  
10 147 cultural and religious beliefs influence understandings of the causation of malaria.[15, 23-25]  
11  
12 148 These beliefs impact on adherence to bednet usage and influence attitudes towards health  
13  
14 149 seeking behaviour. Understanding how communities perceive malaria and preventive  
15  
16  
17 150 measures such as bednet compliance can inform future *P. knowlesi* malaria control  
18  
19 151 programs.[3] Along with understanding community behaviour, existing traditional knowledge  
20  
21  
22 152 should also be assessed prior to the design and implementation of *P. knowlesi* malaria control  
23  
24 153 strategies.[3] For a program to be sustainable, the community should be involved in its  
25  
26 154 planning, implementation, and evaluation.[11, 15] Rather than focusing on the individual,  
27  
28 155 community empowerment helps to increase the sustainability of interventions.[11] As one of  
29  
30  
31 156 the pillars of a multisectoral approach to vector borne disease control, community  
32  
33 157 participation is a powerful component that is cost-effective, practical, and facilitates  
34  
35 158 behavioural changes that focus on enhanced vector control measures.[11]

37  
38 159 The failures of "one size fits all" strategies for malaria control have prompted a re-  
39  
40 160 evaluation of the importance of communities' local priorities and needs.[11, 15] For example,  
41  
42 161 participatory research approaches can be used to explore the influence of social context on  
43  
44  
45 162 the surrounding environment as well as community behaviours that increase exposure to  
46  
47 163 zoonotic malaria. It is crucial to investigate and explore opportunities for improving malaria  
48  
49 164 disease control. This will assist acceptance in local communities.

51  
52 165 Participatory research (PR), also known as 'community-based PR (CBPR)' or  
53  
54 166 'community research' is a collaborative and iterative research design involving input from  
55  
56 167 researchers and participants.[26] It focuses on research processes that involve local  
57  
58 168 people.[27, 28] The term is used interchangeably, thus throughout this protocol manuscript,  
59  
60

1  
2  
3 169 the term CBPR will be used. Israel *et al* described CBPR as a constructivist and critical  
4  
5  
6 170 theoretical perspective that argues with positivist ideology.[28] Through CBPR, the findings  
7  
8 171 can facilitate improvements in health-related interventions, and generate evidence based  
9  
10 172 practices.[27, 28] CBPR incorporates community perspectives and emphasises the direct  
11  
12  
13 173 engagement of local priorities.[27] CBPR differs from participatory action research (PAR) by  
14  
15 174 shifting the emphasis from action to collaborative research activities.[27, 28]

16  
17 175 CBPR aims to produce knowledge through collaboration between researchers and  
18  
19 176 research participants.[27, 28] CBPR embeds the practice of knowledge democracy by using  
20  
21  
22 177 multiple ways of exploring community knowledge through expressions such as local  
23  
24 178 narratives and songs.[27] This can lead to new insights regarding health research , and can  
25  
26 179 act as a tool for exploring social activity in relation to social action and health equity.[27]  
27  
28  
29 180 Greater sensitivity to communities involving listening to their voices, can generate trust and  
30  
31 181 build partnerships and relationships between researchers and participants.[27] In CBPR  
32  
33 182 studies, both quantitative and qualitative methods can be used.[27] The advantage of CBPR  
34  
35  
36 183 is that researchers can conduct systematic inquiries with study participants. Often these are  
37  
38 184 marginalized or disenfranchised communities, who are immediately affected by the ongoing  
39  
40 185 issues.[27, 28]

#### 41 42 186 43 44 45 187 **Characteristics of the community-based participatory approach**

46  
47 188 Discrete differences exist between CBPR and other research methodologies.[27] CBPR  
48  
49 189 democratizes participant knowledge by instilling the belief that people exert a positive  
50  
51  
52 190 influence on their circumstances.[27] CBPR reduces the gap between theory, research and  
53  
54 191 practical recommendations.[27, 28] There are guidelines such as those described by Israel  
55  
56 192 *et al.*,[28] however each research is unique in that it is dependent on local issues.[27] For  
57  
58 193 example, CBPR studies emphasise a "bottom-up" approach by incorporating local knowledge  
59  
60

1  
2  
3 194 in future planning and program implementation.[27] The co-learning process between  
4  
5  
6 195 researchers and participants facilitates reciprocal transfer of knowledge, skills and  
7  
8 196 capacity.[27] In contrast, other research designs often aim to generate knowledge from  
9  
10 197 research without incorporating local priorities and perspectives. This oversight may result in  
11  
12  
13 198 inappropriate recommendations.[27, 28] CBPR also places an emphasis on the  
14  
15 199 empowerment of community members as co-researchers, by allowing the sharing of  
16  
17 200 information, decision making, and partnerships.[27] CBPR is an alternative approach for  
18  
19 201 empowering, engaging, and creating cohesive and sustainable vector control programmes  
20  
21  
22 202 addressing local issues.[29] In the Philippines, through the Participatory Visual Method (PVM)  
23  
24 203 using photovoice methodology, researchers gained access to the live and social context of  
25  
26 204 the communities through images captured by the participants.[29] The images act as a  
27  
28  
29 205 powerful tool to informed policymakers on communities' belief and preventive measures  
30  
31 206 against malaria, through the eye of community members.[29] Below we describe the methods  
32  
33 207 that will be used and the analyses that will be conducted in this study.  
34  
35

### 36 208 37 38 39 209 **Study perspective and health behaviour model**

40  
41 210 From a constructivist perspective, the meaning and experience of phenomena are socially  
42  
43 211 constructed, for example by social norms, beliefs, and environment, rather than inherent  
44  
45 212 within individuals.[30] This paradigm emphasises the generation of understanding an issue  
46  
47  
48 213 "from the bottom up" approach.[30] In CBPR studies, community involved in the research  
49  
50 214 through their participation in addressing the research inquiry, through discussion of the data  
51  
52 215 and interpretation of the findings. This process is valued and underpinned by the concept of  
53  
54  
55 216 critical consciousness[31] and feminist theory.[32] Through this ideology, the Brazilian  
56  
57 217 educator Paulo Freire, proposed the concept of education through collective dialogue with  
58  
59 218 the oppressed and poor people.[31] In feminist theory, participants are able to participate in  
60



1  
2  
3 219 the decision making process through the power that arises from the voice of people who live  
4  
5  
6 220 within the issues.[32]

7  
8 221 This study seeks to incorporate an understanding of socio-cultural contexts and their  
9  
10 222 structural conditions on malaria preventative behaviour among individuals and communities  
11  
12 223 exposed to *P. knowlesi* malaria. Previous studies have shown that individuals and  
13  
14 224 communities have their own native and socio-cultural beliefs toward the disease and that  
15  
16  
17 225 influenced malaria preventive behaviour.[13-15] In addition, there are also drivers to and  
18  
19 226 barriers of malaria preventative behaviour in the communities.[15, 18, 19] Participants in the  
20  
21  
22 227 study can provide local perspectives on their beliefs and preventive measures, and offer  
23  
24 228 opinions for future improvement of methods and tools to deliver preventative messages..  
25

26 229

## 27 28 29 230 **Study framework**

30  
31 231 The study framework will integrate the ideation model,[33] the explanatory model,[34] and  
32  
33 232 Murdock's illness causal model.[35] This framework will act as a theoretical lens for  
34  
35 233 knowledge processing in this study. Theory can convey a clear signpost of the study and  
36  
37  
38 234 provide guidance on how and what method will help to answer the research questions.[30]  
39

40 235 The ideation model is a predictive model of behaviour change involving both  
41  
42 236 individuals and communities.[33, 36] It is a socioecological approach involving the integration  
43  
44  
45 237 of communication and multiple behaviour theories.[33, 36] The model acts as a conceptual  
46  
47 238 tool that can identify common psychosocial variables that may influence malaria related  
48  
49 239 behaviour [37-39] This framework identifies a set of psychosocial variables grouped into three  
50  
51  
52 240 domains: cognitive, social support and emotion.[33] For example, cognitive variables or  
53  
54 241 factors include the attitude towards the recommended preventive behaviour, perceived risk  
55  
56 242 and self-efficacy to avoid malaria infection. While emotion, could described the feelings of  
57  
58 243 fear towards malaria infection. Social support variables or factors embrace the community  
59  
60



1  
2  
3 244 support and peer pressure to practice or avoid the recommended preventive behaviour.[37-  
4  
5  
6 245 39]

7  
8 246 The explanatory model is a tool for medical and public health professionals to  
9  
10 247 investigate cultural variations in illness experiences, diagnosis, and treatment.[34] The model  
11  
12 248 aids in developing rapid assessments through direct communication with patients, family  
13  
14  
15 249 members, and relatives.[16, 34] The data produced can facilitate the translation of  
16  
17 250 interventions that consider the local perceptions of illness, circumstances that result in a risk  
18  
19 251 pattern, and community structures that might support the intervention.[16, 34]

20  
21  
22 252 Murdock's illness causal model conceptualised the local perception of causation of  
23  
24 253 disease.[35] According to this theory, it is important to distinguish between beliefs about  
25  
26 254 natural and supernatural causes of illness, which are diverse worldwide, as they influence  
27  
28  
29 255 how disease treatment and behaviour are perceived.[35, 40]

### 30 31 256 32 33 257 **Study aim**

34  
35  
36 258 This study aims to explore the key anthropological drivers of and barriers to zoonotic malaria  
37  
38 259 preventative behaviour among communities exposed to *P. knowlesi* malaria infection. This  
39  
40 260 study will be conducted among adults (age > 18 years old), including those with a history of  
41  
42 261 *P. knowlesi* malaria infection, and those who live in areas with a high incidence of the  
43  
44  
45 262 infection.

46  
47 263 The study will address the primary research question: "According to adults (age > 18  
48  
49 264 years old), including those with past history of this infection, and who live in an area exposed  
50  
51  
52 265 to *P. knowlesi* malaria infection, how and why do their beliefs towards the disease, and social,  
53  
54 266 cultural and environmental challenges, influence zoonotic malaria preventive behaviour?". In  
55  
56 267 view of the fact that current vector control measures do not protect against *Anopheles*  
57  
58  
59 268 mosquito bites, we defined preventive behaviour as 'avoidance of mosquito bites'. We will  
60

1  
2  
3 269 then translate the views of the communities into information for policymakers, thus  
4  
5  
6 270 addressing the second research question: “How can the views and concerns of these  
7  
8 271 communities regarding zoonotic malaria infection inform future *P. knowlesi* malaria control  
9  
10 272 programme?”.

11  
12  
13 273

## 14 15 274 **METHODS AND ANALYSIS**

### 16 17 275 **Study setting**

18  
19  
20 276 This study will be conducted in the highly *P. knowlesi* endemic state of Sabah, Malaysia.[41]  
21  
22 277 Sabah covers 73,904 sq km, with an estimated population of 3.90 million in 2019.[42]  
23  
24 278 Geographically, Sabah is composed of a mix of mountainous regions, coastlines, and tropical  
25  
26  
27 279 rainforests. In Sabah, *Anopheles leucosphyrus* group mosquitoes are the major vector for *P.*  
28  
29 280 *knowlesi* malaria infection.[43] A study by Cooper *et al.* reported five districts in Sabah with  
30  
31 281 a high incidence of *P. knowlesi* malaria; Ranau, Keningau, Tenom, Tambunan, and Kota  
32  
33  
34 282 Marudu, which are located along the Crocker range.[44] The present study will be conducted  
35  
36 283 in the northern region of Sabah in Kudat region, the location of several recent studies on  
37  
38 284 zoonotic malaria.[8, 9, 43, 45] (figure 1).The incidence in Kudat district is estimated at 0.90  
39  
40  
41 285 to 1.36 per 1000 population.[44] The location was selected after obtaining a list districts with  
42  
43 286 village names from the Sabah State Health Department, within areas with high incidences of  
44  
45 287 *P. knowlesi* in 2020.

46  
47 288  
48

### 49 50 289 **Study participants**

51  
52 290 The study participants will be adult men and women (above 18 years old) who can provide  
53  
54 291 informed consent prior to the focus group discussions (FGDs), in-depth interviews (IDIs), and  
55  
56  
57 292 photovoice. The study will include participants who are permanent residents of the village,  
58  
59 293 are mobile, without known cognitive or mental health issues, and are able to answer  
60

1  
2  
3 294 questions in Malay or English language. Due to restrictions imposed by the current COVID-  
4  
5  
6 295 19 pandemic, participants with access to electronic communication tools will be preferred.[46,  
7  
8 296 47] We anticipate the recruitment of participants with access to electronic communication  
9  
10 297 tools will cause bias in the study results. However, in view of the improved COVID-19 situation  
11  
12  
13 298 in Malaysia and the ability to conduct fieldwork with strict Standard Operating Procedures  
14  
15 299 (SOPs), this bias may be minimized by conducting the study at the study sites and via face  
16  
17 300 to face interviews. The sampling method for the FGDs will be purposive sampling among  
18  
19 301 individuals who were previously diagnosed with *P. knowlesi* malaria infection between  
20  
21  
22 302 January 2021 and December 2021. Community leaders will be selected for IDIs.  
23  
24 303 Subsequently, a snowballing technique will be used to recruit other information-rich  
25  
26 304 individuals. For the photovoice, a recruitment pamphlet will be distributed in the village, and  
27  
28  
29 305 we will use purposive sampling to recruit the participants. Excluded from the study will be  
30  
31 306 non-residents, people with known cognitive or mental health issues, and those who are  
32  
33 307 unable to attend interviews or FDGs after two invites. All these methods will be conducted  
34  
35 308 concurrently for twelve months from March 2022 through to March 2023.  
36  
37  
38 309

### 40 310 **Sample size**

41  
42 311 For FGDs, 6 to 8 participants will be enrolled,[48] while the sample size fo IDIs may be up to  
43  
44  
45 312 12 participants.[49] Data will be collected until data saturation is reached, defined as when  
46  
47 313 there is no new information collected from subsequent participants.[48, 49] Earlier studies  
48  
49 314 using photovoice reported enrolling between four and 122 participants.[50] We aim to recruit  
50  
51 315 10 to 15 participants.  
52  
53  
54 316  
55  
56  
57  
58  
59  
60

1

2

### 3 317 **Categorisation of participation**

4

5 318 The gradation of participation in this study is informed by Arnstein's "ladder of citizen  
6 participation" categorization.[51] This ladder distinguishes three main participation  
7 categories: citizen power, tokenism, and non-participation; and eight levels: manipulation,  
8 319 therapy, informing, consultation, placation, partnership, delegated power, and client  
9 control.[51] We will utilise tokenism in our study. During the FGDs, IDIs, and photovoice, we  
10 320 will ensure that communication between researchers and participants allows them the  
11 opportunity to influence the discussion and analysis. However, those with power (e.g  
12 321 policymakers) will have power over decisions.[51] For example, to ensure meaningful  
13 "tokenism" between researchers and participants in photovoice, we will provide an  
14 introduction and training workshop prior to commencing the method. The workshop will  
15 322 ensure a safe working environment, and agreements will be reached between the  
16 researchers and participants upon the methodology.[52, 53] During the photovoice progress,  
17 323 we will regularly discuss the conditions for cooperation with the participants. The research  
18 questions will be shared with participants.[53] We will communicate in a clear manner in the  
19 324 Malay language and tailor communication to the literacy and coping level of the participants.  
20 The participants will receive a "token" for participating in the study. Participants will have the  
21 right to withdraw from the study at any point.

22 325

23 326

24 327

25 328

26 329

27 330

28 331

29 332

30 333

31 334

32 335

33 336

34 337

35 338

36 339

37 340

38 341

39 342

40 343

41 344

42 345

43 346

44 347

45 348

46 349

47 350

48 351

49 352

50 353

51 354

52 355

53 356

54 357

55 358

56 359

57 360

58 361

59 362

60 363

61 364

62 365

63 366

64 367

65 368

66 369

67 370

68 371

69 372

70 373

### 47 336 **Study design**

48

49 337 The study is a multimethod design using the CBPR methodology.[27] This study will be  
50 conducted over a 12 month period. Rapport will be established with individuals so that topics  
51 338 can be freely discussed.[27] The study will use FGD, IDI, and the photovoice method, which  
52 offers the advantage of triangulating the data. A semi-structured interview guides have been  
53 prepared and approved by the research supervisory and ethical committees. The views of all

54 339

55 340

56 341

57 342

58 343

59 344

60 345

1  
2  
3 342 participants which will be recruited in different methods, will be compared and interpreted to  
4  
5  
6 343 achieve data triangulation. The photovoice will raise their perspectives and concerns using  
7  
8 344 an iterative and collaborative process.[50, 54] The researchers' role will be to introduce the  
9  
10 345 research aims and questions to the participants. In view of study using the CBPR  
11  
12 346 methodology, the creation of discussion will be conducted through dialogues with participants  
13  
14  
15 347 (co-researchers).[27] The dissemination of study findings with policymakers will either be  
16  
17 348 conducted through exhibition (e.g at local townhall) or different platforms (e.g colored book,  
18  
19 349 peer-reviewed manuscript, conference presentations).[53-55] (figure 2) However, due to the  
20  
21  
22 350 COVID-19 pandemic, research methods may be modified to accommodate social distancing  
23  
24 351 requirements and other SOPs.  
25

## 26 352 27 28 **Study phases** 29 353

### 30 31 354 Phase 1: Preparation 32

33 355 The first phase of the study is to conduct a systematic literature review to understand: i) the  
34  
35 356 behaviour or activities that expose humans to *P. knowlesi* malaria infection, and ii) how data  
36  
37  
38 357 on behaviour were collected in previous studies.[5] The literature searched was from  
39  
40 358 standard scientific databases. The article abstracts were screened and assessed by three  
41  
42 359 researchers, and any disagreement on the quality of the studies was resolved by consensus  
43  
44  
45 360 of the co-authors.[5] The Joanna Briggs Institute critical appraisal checklist was used to rate  
46  
47 361 the quality of the studies. A grey literature search was also performed from the WHO website.  
48  
49 362 It was found that the that majority of the included studies were done quantitatively, limiting a  
50  
51  
52 363 deep understanding of human behaviour.[5] Several factors such as socioeconomic status,  
53  
54 364 beliefs, perceived threats, motivation, and coping issues can influence communities' malaria  
55  
56 365 preventive behaviour.[5] Future studies must consider using qualitative study designs in order  
57  
58  
59 366 to generate a rich information and address how human behaviour can influence the exposure  
60

1  
2  
3 367 to zoonotic malaria.[5] Furthermore, the importance of community perspective on *P. knowlesi*  
4  
5 368 malaria control is critical to strategize a specific *P. knowlesi* malaria control guidelines.[5, 7]  
6  
7

8 369 The next step was to develop a research framework that would function as the  
9  
10 370 theoretical lens for this study. The theoretical lens is the study's assumptions that will guide  
11  
12 371 the study methodology.[30] Using the modified Delphi study, new themes were generated  
13  
14  
15 372 through the consensus of experts.[56] The experts were selected based on the inclusion  
16  
17 373 criteria as per the protocol.[56] Twelve experts were selected based on (I) having more than  
18  
19 374 five years of experience working or practicing in any research institutions, having an  
20  
21  
22 375 administrative post in any organization and conducting malaria research, (II) individuals who  
23  
24 376 have published more than one study on malaria in peer-reviewed journals and (III) consented.  
25  
26 377 This framework focused on factors that possibly influence malaria preventative behaviour in  
27  
28  
29 378 communities exposed to *P. knowlesi* malaria infection through the collective agreement  
30  
31 379 among the expert panels.[56] (figure 3).  
32

33 380 The third stage will be selection of participants. A pamphlet using the Malay language  
34  
35 381 were distributed in the village to recruit participants for photovoice (figure 4). The distribution  
36  
37  
38 382 were done after the meeting with the community leaders. Only those individuals who show  
39  
40 383 interest and match our eligibility criteria will be recruited. The purposive and convenience  
41  
42 384 sampling method will be used to avoid participants' dropouts. The photovoice participants will  
43  
44  
45 385 attend a workshop introducing the study, discussing ethical considerations, distributing tasks,  
46  
47 386 and outlining responsibilities. Participation will continue throughout the study duration.[55]  
48

49 387  
50  
51 388 Phase 2: Implementation of the study

52  
53  
54 389 The implementation of the study is as follows: FGDs and IDIs will be conducted with  
55  
56 390 participants to answer the specific research questions. Participants will participate in  
57  
58 391 discussions and undergo interviews using the interview guides. Data will be collected and  
59  
60

1  
2  
3 392 analysed by the research team. The research team consists of epidemiologists, public health  
4  
5  
6 393 specialists, medical anthropologists, infectious disease experts and a postgraduate student.  
7  
8 394 FGDs, IDIs, and photovoice will be recorded, transcribed *verbatim* by the research team, and  
9  
10 395 analysed using thematic analysis by Braun and Clark approach.[57]  
11

12  
13 396 The FGDs and IDIs will be performed in a place familiar to the participants.[58] The  
14  
15 397 FGDs will start with a general question about what participants perceive about *P. knowlesi*  
16  
17 398 malaria infection, explore their beliefs concerning illness causation, and how and why these  
18  
19 399 beliefs influence their malaria-preventive behaviour. Prompts will also be used to gather  
20  
21  
22 400 information and to generate a richer data. The FGDs will be conducted for approximately 90  
23  
24 401 minutes, preferably without breaks.[58] The session will continue until a clear pattern  
25  
26 402 emerges and subsequent interviews do not produce new information.[57] IDIs will be  
27  
28  
29 403 conducted individually using an interview guide. Potential key informants, such as people of  
30  
31 404 influence in the community, such as the head of village and faith leaders,[59] will be contacted  
32  
33 405 by formal letter, individually. A meeting has been arranged with this gatekeeper to build  
34  
35 406 rapport and to request permission to conduct the study at the site.[60]  
36

37  
38 407 Interviews will be conducted using face to face sessions, however electronic  
39  
40 408 communication may be warranted depending on the COVID-19 situation. The duration of the  
41  
42 409 interview will be approximately 60-90 minutes.[57, 58] The session will be written in fieldnotes  
43  
44  
45 410 and recorded, audio and verbally. As a means to maintain data trustworthiness, member-  
46  
47 411 checking and external coding will be used to validate the data .interpretation and coding.[61]  
48

49 412 In photovoice, participants will take photographs (e.g using camera or smartphones),  
50  
51  
52 413 discuss them through the FGDs, and select the photos that best reflects the community for  
53  
54 414 future dissemination of study findings.[62, 63] Photovoice research team will work as closely  
55  
56 415 as possible with the local structures and institutions to facilitate meaningful long-term  
57  
58 416 participation.[62] The goals, strategies, and limitations for social change will be clearly and  
59  
60



1  
2  
3 417 realistically defined and communicated to avoid raising the expectations of participants.[54,  
4  
5  
6 418 63] The photovoice participants will have specific rules; such as the requirement of consent  
7  
8 419 before taking pictures of adults and avoiding pictures of children. A WhatsApp group will be  
9  
10 420 created by the researchers through which the participants will be encouraged to share the  
11  
12  
13 421 photos. The photographs taken by the participants, that will be shared with policymakers,  
14  
15 422 have value in that they provide the opportunity for virtual display when words are difficult to  
16  
17 423 express their views.[54, 62] Previous research described participants shared around 9-182  
18  
19 424 photographs and suggests that participants take an average of 40 to 50 photos each.[62] We  
20  
21  
22 425 will recommend 10 photos per participant. The photographs can be taken anywhere, such as  
23  
24 426 the home, street, or other aspects of the participant's environment, target actions, places,  
25  
26 427 and situations.[55, 62, 63] We will use the SHOWeD algorithm to reveal the participants'  
27  
28  
29 428 reflections of their photos.[63] The narrative caption of the photos will reveal meaningful  
30  
31 429 experiences that can improve awareness of relevant issues.[63]  
32

33 430

### 35 431 Phase 3: Dissemination

37  
38 432 Due to the ongoing COVID-19 epidemic and resulting restrictions, we will look for  
39  
40 433 opportunities to present the research findings on appropriate platforms. Thus, dissemination  
41  
42 434 will not only be at the local townhall with the participants, but also through online research  
43  
44  
45 435 presentations, various scientific presentations, and a book.[55] The book will include coloured  
46  
47 436 photos and narratives from participants that illustrate their perspectives on local beliefs, and  
48  
49 437 the drivers and barriers to malaria preventive behaviour. All the photovoice participants, will  
50  
51  
52 438 be given an opportunity to review the initial draft. Hardcopies will be disseminated to  
53  
54 439 policymakers (for example the Sabah State Health Department and Ministry of Health  
55  
56 440 Malaysia).

57  
58  
59  
60



## Supervisory committee

The supervisory committee will monitor the study process, from initiation to the end of the study. They will provide advice on the content of the study and its appropriateness with respect to the study aims. Monthly meetings are planned, and members of the supervisory committee will be asked for further input, if needed. Researchers and stakeholders will be a part of this supervisory committee.

## Patient and public involvement

Participants were not directly involved in the study design. The FGD and IDI participants will only act as research participants. Meanwhile, the photovoice participants will conduct the photography session, give inputs in analysis, and participate in the exhibition. The researchers will conduct the final reporting and dissemination plan of this research.

## DATA ANALYSIS

Data will be collected by the researcher and research assistants (RAs), who are proficient in the local language. The RAs will be trained by the research team and will be the observers, notetakers and translators. The RAs will assist in transcribing the data from the local language into English. We will use the qualitative software program ATLAS.ti Version 9 (ATLAS.ti Scientific Software Development GmbH), to assist with data handling, storing, and creating networks images, quotations, codes, themes, in a systematic way.

## Thematic analysis

Thematic analysis by Braun and Clark will be used to generate codes and themes from the data.[57] Data familiarisation will be through re-reading the verbatim and re-viewing the

1  
2  
3 466 photographs.[57] Familiarisation, is a time-consuming process which includes the phase of  
4  
5  
6 467 immersion, where researchers engage deeply with the data to find a richer meanings and  
7  
8 468 generate patterns from the data.[57] In addition, this phase include critical engagement and  
9  
10 469 note-making of thoughts related with the data.[57] Then, Initial codes will be generated  
11  
12 470 systematically across the whole data set.[57] Themes will be identified within codes, and  
13  
14  
15 471 these themes will be named and defined.[57] Prior to the writeup, a review of the themes will  
16  
17 472 be conducted.[57]

19 473  
20

### 21 22 474 **Rigor and data trustworthiness**

23  
24 475 Rigor is defined as the demonstration of integrity and competence within a study.[64] Data  
25  
26 476 trustworthiness will be gained through feedback from participants (credibility, dependability),  
27  
28  
29 477 checks by participants and the research team (confirmability), and a thorough description of  
30  
31 478 data collection and analysis (transferability).[61] Member-checking will be performed after all  
32  
33 479 sessions of the chosen methods are completed.[61] For example, after an IDI session is  
34  
35  
36 480 completed, a summary will be given to participants to confirm or comment on the researcher's  
37  
38 481 understanding throughout the session, and to maintain data accuracy. It will provide the  
39  
40 482 opportunity to modify errors or wrong interpretations.[61] External coding will increase the  
41  
42 483 validity of the data.[61] The coding process will be individually applied to the IDIs, FGDs, and  
43  
44  
45 484 photovoice data. The data will be triangulated to answer the research questions (RQs), as  
46  
47 485 well as by generating new themes.[57]

48  
49 486  
50

### 51 52 487 **Reflexivity of the researcher**

53  
54 488 Reflexivity and subjectivity are important characteristics of qualitative studies using thematic  
55  
56 489 analyses.[57] The CBPR method encourages a self-reflective, engaged, and self-critical role  
57  
58 490 among researchers.[27] The primary investigator (PI) in this study has 10 years of experience  
59  
60

1  
2  
3 491 of working as a primary care medical practitioner in a rural district in Sabah, Malaysia. The  
4  
5  
6 492 PI will be the "facilitator" or "moderator" to guide the discussion between participants.[30]  
7

### 10 494 **Study outcome**

11  
12 495 Community participation in research is critical for developing information, education, and  
13  
14  
15 496 communication tools to produce and promote public health programmes.[27] The views and  
16  
17 497 reflections of the community in the study are relevant for culturally sensitive and effective  
18  
19 498 future *P. knowlesi* malaria-intervention programs. Furthermore, it could result in a more  
20  
21  
22 499 sustainable malaria interventions.[11] The outcome of this study will be used to inform the  
23  
24 500 development of community-friendly and appropriate intervention tools. This approach is  
25  
26 501 viewed as an essential component of ethical good practice in research.[27] It brings the  
27  
28  
29 502 communities' perspective and voices a way forward, through engagement in research, health  
30  
31 503 equity and increasing the chances of success of an intervention.[11, 27] Intervention can be  
32  
33 504 in the form of education, reflection, and discussion.[27]  
34

### 35 505 36 37 38 506 **Study status**

39  
40 507 The preliminary study was conducted from the 30<sup>th</sup> of December 2021 to the 28<sup>th</sup> of February  
41  
42  
43 508 2022. As part of the participatory approach, the gatekeepers (the healthcare workers and  
44  
45 509 community leaders in the study sites), were met to introduce the study and discussed on the  
46  
47 510 methodological feasibility and appropriateness of conducting the study during the COVID-19  
48  
49  
50 511 pandemic. In view of COVID-19 disease prevention, only fully vaccinated community  
51  
52 512 members will be allowed to participate in the study and all participants needs to adhere to  
53  
54 513 COVID -19 SOPs such as wearing masks and social distancing. The results of this  
55  
56  
57 514 preliminary study will be disseminated in future peer-reviewed manuscript.  
58  
59  
60

1  
2  
3  
4  
5  
6  
7  
8  
9  
10  
11  
12  
13  
14  
15  
16  
17  
18  
19  
20  
21  
22  
23  
24  
25  
26  
27  
28  
29  
30  
31  
32  
33  
34  
35  
36  
37  
38  
39  
40  
41  
42  
43  
44  
45  
46  
47  
48  
49  
50  
51  
52  
53  
54  
55  
56  
57  
58  
59  
60

### 515 **Ethics and dissemination**

516 This study has been approved by the Medical Research and Ethics Committee, Ministry of  
517 Health Malaysia (NMRR ID-21-01980-JEH), and the Research and Innovation Secretariat,  
518 Faculty of Medicine, Universiti Kebangsaan Malaysia (FF-2021-462). All the participants will  
519 provide consent prior to participation. Participants are allowed to withdraw at any point during  
520 the study. The results will be disseminated in various academic (e.g. conferences, journals)  
521 and non-academic (e.g. town hall meetings) platforms.

### 523 **DISCUSSION**

524 Efforts have been made to assess how CBPR can be an effective research methodology for  
525 *P. knowlesi* malaria intervention. CBPR has possible important implications for the  
526 sustainability and appropriateness of *P. knowlesi* malaria interventions. Many previous  
527 programs have failed because of a lack of genuine community participation.[11] CBPR  
528 provides insights from local people to improve the quality of research, ensure validity and  
529 improve public health intervention.[27] The recognition of community perspectives on the  
530 aetiology of illness, drivers of and barriers to preventive measures can provide a fresh  
531 perspective on research issues, and helps to facilitate intervention tailored to local  
532 conditions.[27] The engagement of communities has improved communication tools for the  
533 promotion of effective and sustainable interventions, enhanced their relevance and feasibility,  
534 and improved data utilisation by all stakeholders.[11, 27] The use of CBPR in health research  
535 promises far-reaching changes in short- and long-term outcomes.[27] We hope to provide  
536 empirical evidence to help develop future zoonotic malaria control programs. Community  
537 engagement and feedback in our research will increase the reliability and validity of the study  
538 through local knowledge and theory based on experiences. Changing the relationship  
539 between researchers and those who participate in research involves a transformation of

1  
2  
3 540 power and views of the issues that should promote a more flexible and reflexive process  
4  
5  
6 541 among researchers.[27] Participants will be empowered when their views and voices are  
7  
8 542 heard.[54] Future studies and collaborations that combine CBPR methodology and  
9  
10 543 emphasise on community participation will reinforce additional knowledge and appropriate  
11  
12  
13 544 behaviour changes.[27]

## 17 546 Study limitations

18  
19  
20 547 It is possible that we may encounter a lack of trust among community members with the  
21  
22 548 study, due to the limitation of time and space to engage with the whole community members  
23  
24 549 due to the current COVID-19 pandemic. We will attempt to minimise this by establishing trust  
25  
26  
27 550 through early communication and engagement with the head of the villages. Community  
28  
29 551 members may be sceptical about participating in the study in case their opinions are  
30  
31 552 considered invalid, thus a poor response rate in certain phases of this study may be  
32  
33  
34 553 encountered. A qualitative study is not a generalisable design but has the potential to develop  
35  
36 554 an in-depth understanding of the community from a small number of participants.[30] Due to  
37  
38 555 differences in overall philosophy, assumptions, beliefs, decision-making, and values, conflicts  
39  
40 556 can arise between study members and different organisations.

## 45 558 Acknowledgments

46  
47 559 The writing of this protocol was made possible by input from various experts. For their positive  
48  
49  
50 560 and constructive critiques, we would like to thank Prof. Douglas Storey and Dr April Monroe  
51  
52 561 from the John Hopkins Center for Communication Studies; Dr Gill Black from the Sustainable  
53  
54 562 Livelihoods Foundation (SLF); Dr Jeffrey Hii from the Malaria Consortium, Mahidol University,  
55  
56  
57 563 Thailand; Prof Kalsom Kayat from Universiti Utara Malaysia; Prof Lenore Manderson from  
58  
59 564 the School of Public Health, University of the Witwatersrand and the Monkeybar project. We  
60

1  
2  
3 565 are truly grateful to both Dr Janet Cox-Singh from the University of St Andrews and Dr Cyrus  
4  
5  
6 566 Daneshvar from Plymouth Hospitals NHS; for their sharing of expert advice and experiences  
7  
8 567 during their early years conducting malaria studies in Sarawak, Malaysia.  
9

10 568

## 11 12 569 **Contributors**

13  
14  
15 570 NAN was the principal investigator responsible for the design of the study and drafting the  
16  
17 571 manuscript. MRH was the coordinating investigator. RC, MSJ, RH, KA, and MRH contributed  
18  
19 572 equally to the content of the study protocol with important intellectual revisions. All authors  
20  
21  
22 573 read and approved the final protocol manuscript.  
23

24 574

25

## 26 575 **Funding**

27  
28  
29 576 This study received funding from Universiti Kebangsaan Malaysia grant FF-2021-462.  
30

31 577

32

## 33 578 **Competing interests**

34  
35 579 There are no conflicts of interest associated with this protocol.  
36

37

38 580

39

40 581

41

## 42 582 **References**

- 43  
44  
45 583 1 World Health Organization. *World Malaria Report: 20 Years of Global Progress and*  
46  
47 584 *Challenges*. Geneva: World Health Organization (2020). ISBN 978-92-4-001579-1  
48  
49  
50 585 (electronic version). <https://www.who.int/publications/i/item/9789240015791>  
51  
52 586 (accessed 10 October 2021)  
53  
54 587 2 Ahmed MA, Cox-Singh J. Plasmodium knowlesi - an emerging pathogen. *ISBT Sci*  
55  
56 588 *Ser* Published Online First: 2015. doi:10.1111/voxs.12115  
57  
58  
59 589 3 Naserrudin NA, Hod R, Jeffree MS, *et al*. The Emerging Threat of Plasmodium  
60

- 1  
2  
3 590 knowlesi Malaria Infection: A Concept Paper on the Vulnerable Factors in Human. *Int*  
4  
5  
6 591 *J Environ Res Public Heal* 2022, Vol 19, Page 4419 2022;**19**:4419.  
7  
8 592 doi:10.3390/IJERPH19074419  
9
- 10 593 4 Chin AZ, Maluda MCM, Jelip J, *et al.* Malaria elimination in Malaysia and the rising  
11  
12 threat of Plasmodium knowlesi. *J Physiol Anthropol* 2020;**39**:1–9.  
13 594  
14  
15 595 doi:10.1186/s40101-020-00247-5  
16
- 17 596 5 Naserrudin NA, Hod R, Jeffree MS, *et al.* The Role of Human Behavior in  
18  
19 Plasmodium knowlesi Malaria Infection: A Systematic Review. *Int J Environ Res*  
20 597  
21 *Public Health* 2022;**19**:3675. doi:10.3390/IJERPH19063675  
22 598  
23
- 24 599 6 Rajahram GS, Cooper DJ, William T, *et al.* Deaths From Plasmodium knowlesi  
25  
26 600 Malaria: Case Series and Systematic Review. *Clin Infect Dis* 2019;**69**:1703–11.  
27  
28  
29 601 doi:10.1093/cid/ciz011  
30
- 31 602 7 Naserrudin NA, Monroe A, Culleton R, *et al.* Reimagining zoonotic malaria control in  
32  
33 603 communities exposed to Plasmodium knowlesi infection. *J Physiol Anthropol*  
34  
35 604 2022;**41**:14. doi:10.1186/S40101-022-00288-Y  
36
- 37  
38 605 8 Fornace KM, Brock PM, Abidin TR, *et al.* Environmental risk factors and exposure to  
39  
40 606 the zoonotic malaria parasite Plasmodium knowlesi across northern Sabah, Malaysia:  
41  
42 607 a population-based cross-sectional survey. *Lancet Planet Heal* 2019;**3**:e179–86.  
43  
44  
45 608 doi:10.1016/S2542-5196(19)30045-2  
46
- 47 609 9 Stark DJ, Fornace KM, Brock PM, *et al.* Long-Tailed Macaque Response to  
48  
49 610 Deforestation in a Plasmodium knowlesi-Endemic Area. *Ecohealth* 2019;**16**:638–46.  
50  
51  
52 611 doi:10.1007/s10393-019-01403-9  
53
- 54 612 10 Vythilingam I, Chua TH, Liew JWK, *et al.* The vectors of Plasmodium knowlesi and  
55  
56 613 other simian malarias Southeast Asia: challenges in malaria elimination. *Adv*  
57  
58 614 *Parasitol* 2021;**113**:131-189. doi: 10.1016/bs.apar.2021.08.00511  
59  
60



- 1  
2  
3 615 11 World Health Organization (WHO). Multisectoral approach to the prevention and  
4 control of vector-borne diseases: a conceptual framework. World Health  
5 616 Organization.(2020). <https://apps.who.int/iris/handle/10665/331861>. License: CC BY-  
6 617 NC-SA 3.0 IGO (accessed on 30 October 2021)  
7  
8 618  
9  
10 618  
11  
12 619 12 Mak JW, Jegathesan M, Lim PKC, *et al*. Epidemiology and control of malaria in  
13 620 Malaysia. *Southeast Asian J Trop Med Public Health* 1992;**23**:572–7.  
14  
15 621 13 Ekawati LL, Johnson KC, Jacobson JO, *et al*. Defining malaria risks among forest  
16 622 workers in Aceh, Indonesia: a formative assessment. *Malar J* 2020;**19**:441.  
17 623 doi:10.1186/s12936-020-03511-2  
18  
19 624 14 Munajat MB, Rahim MAFA, Wahid W, *et al*. Perceptions and prevention practices on  
20 625 malaria among the indigenous Orang Asli community in Kelantan, Peninsular  
21 626 Malaysia. *Malar J* 2021;**20**:202. doi:10.1186/s12936-021-03741-y  
22  
23 627 15 Heggenhougen HK, Hackethal V, Vivek P, *et al*. The behavioural and social aspects  
24 628 of malaria and its control : an introduction and annotated bibliography. UNDP/World  
25 629 Health Organization Special Programme for Research and Training in Tropical  
26 630 Diseases.(2003).<https://apps.who.int/iris/handle/10665/42504>.(accessed on 1  
27 631 November 2021)  
28  
29 632 16 Manderson L, Cartwright E, Hardon, Anita E. *The Routledge Handbook of Medical*  
30 633 *Anthropology*. Milton Park: Abingdon, UK; Routledge: New York, NY, USA (2016)  
31  
32 634 17 Finda MF, Moshi IR, Monroe A, *et al*. Linking human behaviours and malaria vector  
33 635 biting risk in south-eastern Tanzania. *PLoS One* 2019;**14**:1–23.  
34 636 doi:10.1371/journal.pone.0217414  
35  
36 637 18 Monroe A, Olapeju B, Moore S, *et al*. Improving malaria control by understanding  
37 638 human behaviour. 2021;:97–100. doi:10.2471/BLT.20.285369  
38  
39 639 19 Monroe A, Asamoah O, Lam Y, *et al*. Outdoor-sleeping and other night-time activities  
40  
41  
42  
43  
44  
45  
46  
47  
48  
49  
50  
51  
52  
53  
54  
55  
56  
57  
58  
59  
60



1  
2  
3  
4  
5  
6  
7  
8  
9  
10  
11  
12  
13  
14  
15  
16  
17  
18  
19  
20  
21  
22  
23  
24  
25  
26  
27  
28  
29  
30  
31  
32  
33  
34  
35  
36  
37  
38  
39  
40  
41  
42  
43  
44  
45  
46  
47  
48  
49  
50  
51  
52  
53  
54  
55  
56  
57  
58  
59  
60

- 640 in northern Ghana: implications for residual transmission and malaria prevention.  
641 *Malar J* 2015;**14**:35. doi:10.1186/s12936-015-0543-4
- 642 20 De Ang JX, Yaman K, Kadir KA, *et al.* New vectors that are early feeders for  
643 Plasmodium knowlesi and other simian malaria parasites in Sarawak, Malaysian  
644 Borneo. *Sci Rep* 2021;**11**. doi:10.1038/s41598-021-86107-3
- 645 21 Scott J. Proposed integrated control of zoonotic Plasmodium knowlesi in Southeast  
646 Asia using themes of one health. *Trop Med Infect Dis* 2020;**5**:175.  
647 doi:10.3390/tropicalmed5040175
- 648 22 Kamat VR. 'I thought it was only ordinary fever!' cultural knowledge and the  
649 micropolitics of therapy seeking for childhood febrile illness in Tanzania. *Soc Sci Med*  
650 2006;**62**:2945–59. doi:10.1016/j.socscimed.2005.11.042
- 651 23 Taek MM, Banilodu L, Neonbasu G, *et al.* Ethnomedicine of Tetun ethnic people in  
652 West Timor Indonesia: philosophy and practice in the treatment of malaria. *Integr*  
653 *Med Res* 2019;**8**:139–44. doi:10.1016/j.imr.2019.05.005
- 654 24 Espino F, Manderson L, Acuin C, *et al.* Perceptions of malaria in a low endemic area  
655 in the Philippines: transmission and prevention of disease. *Acta Trop* 1997;**63**:221–  
656 39. doi:10.1016/S0001-706X(96)00623-7
- 657 25 Sundararajan R, Kalkonde Y, Gokhale C, *et al.* Barriers to malaria control among  
658 marginalized tribal communities: a qualitative study. *PLoS One* 2013;**8**:e81966.  
659 doi:10.1371/journal.pone.0081966
- 660 26 Cornwall A, Rachel J. What is Participatory Research? *Soc Sci Med* 1995;**41**:1667–  
661 74. doi:10.2167/md073.0
- 662 27 Wallerstein N, Duran B, Oetzel JG, *et al.* Community-based participatory research for  
663 health : advancing social and health equity. San Francisco, CA : Jossey-Bass, a  
664 Wiley Brand (2018)

- 1  
2  
3 665 28 Israel BA, Schulz AJ, Parker EA, *et al.* Review of community-based research:  
4  
5  
6 666 Assessing Partnership Approaches to Improve Public Health. *Annu Rev Public Health*  
7  
8 667 1998;19:173-202.doi: 10.1146/annurev.publhealth.19.1.173 1998.  
9  
10 668 29 Iskander D. Re-imaging malaria in the Philippines: How photovoice can help to re-  
11  
12 669 imagine malaria. *Malar J* 2015;14:1–12. doi:10.1186/s12936-015-0770-8  
13  
14  
15 670 30 Creswell JW, Plano-Clark VL. *Designing and conducting mixed methods research (3<sup>rd</sup>*  
16  
17 671 *ed)*. Thousand Oaks, CA: SAGE (2018)  
18  
19 672 31 Paulo Freire. Education for critical consciousness (Vol. 1) *Continuum*. New York  
20  
21 673 *Seabury* (1973)  
22  
23  
24 674 <https://www.scirp.org/reference/ReferencesPapers.aspx?ReferenceID=1055706>  
25  
26 675 (accessed 10 December 2021).  
27  
28  
29 676 32 Smith Dorothy Edith. *Everyday world as problematic A feminist sociology*. Boston  
30  
31 677 *Northeastern University Press* (1987)  
32  
33 678 <https://www.scirp.org/reference/ReferencesPapers.aspx?ReferenceID=1010569>  
34  
35 679 (accessed 15 December 2021).  
36  
37  
38 680 33 Health Communication Capacity Collaborative (HC3). Ideation - An HC3 Research  
39  
40 681 Primer. Balt. HC3 John Hopkins Cent. Commun. Program (2014).  
41  
42 682 <https://healthcommcapacity.org/hc3resources/ideation-hc3-research-primer/>.  
43  
44 683 (accessed 1 September 2021)  
45  
46  
47 684 34 Kleinman A. Concepts and a model for the comparison of medical systems as cultural  
48  
49 685 systems. *Soc Sci Med* 1978;12:85–93. doi:10.1016/0160-7987(78)90014-5  
50  
51  
52 686 35 Murdock GP, Wilson SF, Frederick V. World distribution of theories of illness.  
53  
54 687 *Ethnology* 1978;17:449–70. doi:10.2307/3773194  
55  
56 688 36 Kincaid DL. Social networks, ideation, and contraceptive behavior in Bangladesh: a  
57  
58 689 longitudinal analysis. *Soc Sci Med* 2000;50:215–31. doi:10.1016/s0277-  
59  
60

1  
2  
3  
4  
5  
6  
7  
8  
9  
10  
11  
12  
13  
14  
15  
16  
17  
18  
19  
20  
21  
22  
23  
24  
25  
26  
27  
28  
29  
30  
31  
32  
33  
34  
35  
36  
37  
38  
39  
40  
41  
42  
43  
44  
45  
46  
47  
48  
49  
50  
51  
52  
53  
54  
55  
56  
57  
58  
59  
60

- 690 9536(99)00276-2.
- 691 37 Storey JD, Babalola SO, Ricotta EE, *et al.* Associations between ideational variables  
and bed net use in Madagascar, Mali, and Nigeria. *BMC Public Health* 2018;**18**:484.  
doi:10.1186/s12889-018-5372-2
- 694 38 Do M, Babalola S, Awantang G, *et al.* Associations between malaria-related  
ideational factors and care-seeking behavior for fever among children under five in  
Mali, Nigeria, and Madagascar. *PLoS One* 2018;**13**:e0191079.  
doi:10.1371/journal.pone.0191079
- 698 39 Olapeju B, Adams C, Wilson S, *et al.* Malaria care-seeking and treatment ideation  
among gold miners in Guyana. *Malar J* 2022 211 2022;**21**:1–10. doi:10.1186/S12936-  
022-04045-5
- 701 40 Kahissay MH, Fenta TG, Boon H. Beliefs and perception of ill-health causation: a  
socio-cultural qualitative study in rural North-Eastern Ethiopia. *BMC Public Health*  
2017;**17**:124. doi:10.1186/s12889-017-4052-y
- 704 41 Abeyasinghe R. Outcomes from the Evidence Review Group on Plasmodium  
knowlesi. 2017. [https://www.who.int/malaria/mpac/mpac-mar2017-plasmodium-  
knowlesi-presentation.pdf](https://www.who.int/malaria/mpac/mpac-mar2017-plasmodium-knowlesi-presentation.pdf) (accessed 30 September 2021).
- 707 42 Department of Statistics Malaysia. Department of Statistics Malaysia Press Release:  
Current Population Estimates, Malaysia, 2018-2019. Dep. Stat. Malaysia. 2019.  
<https://www.dosm.gov.my> (accessed 15 September 2021)
- 710 43 Chua TH, Manin BO, Vythilingam I, *et al.* Effect of different habitat types on  
abundance and biting times of *Anopheles balabacensis* Baisas (Diptera: Culicidae) in  
Kudat district of Sabah, Malaysia. *Parasites and Vectors* 2019;**12**.  
doi:10.1186/s13071-019-3627-0
- 714 44 Cooper DJ, Rajahram GS, William T, *et al.* Plasmodium knowlesi Malaria in Sabah ,

- 1  
2  
3 715 Malaysia , 2015 – 2017 : ongoing increase in incidence despite near- elimination of  
4  
5 the human-only Plasmodium species. 2020;**70**:2015–7. doi:10.1093/cid/ciz237  
6 716  
7  
8 717 45 Brown R, Chua TH, Fornace K, *et al*. Human exposure to zoonotic malaria vectors in  
9  
10 718 village, farm and forest habitats in Sabah, Malaysian Borneo. *PLoS Negl Trop Dis*  
11  
12 719 2020;**14**:1–18. doi:10.1371/journal.pntd.0008617  
13  
14  
15 720 46 Malka M. Photovoice as a creative coping tool with the COVID-19 crisis in practical  
16  
17 721 training seminar for social work students. *Qual Soc Work* 2021;**20**:544–52.  
18  
19 722 doi:10.1177/1473325020973309  
20  
21  
22 723 47 Dodds S, Hess AC. Adapting research methodology during COVID-19: lessons for  
23  
24 724 transformative service research. *J Serv Manag* 2020;**32**:203–17. doi:10.1108/JOSM-  
25  
26 725 05-2020-0153  
27  
28  
29 726 48 Guest, G., Namey, E., & McKenna, K. (2016). How Many Focus Groups Are Enough?  
30  
31 727 Building an Evidence Base for Nonprobability Sample Sizes. *Field Methods*, 29(1), 3–  
32  
33 728 22. doi:10.1177/1525822x16639015  
34  
35  
36 729 49 Guest G, Namey E, Chen M. A simple method to assess and report thematic  
37  
38 730 saturation in qualitative research. *PLoS One* 2020;**15**:1–17.  
39  
40 731 doi:10.1371/journal.pone.0232076  
41  
42 732 50 Hergenrather KC, Rhodes SD, Cowan CA, *et al*. Photovoice as community-based  
43  
44 participatory research: A qualitative review. *Am J Health Behav* 2009;**33**:686–98.  
45 733  
46  
47 734 doi:10.5993/AJHB.33.6.6  
48  
49 735 51 Arnstein SR. A Ladder of Citizen Participation. *J Am Plan Assoc* 1969;**35**:216–24.  
50  
51 736 doi:10.1080/01944363.2018.1559388  
52  
53  
54 737 52 Wang C, Burris MA. Photovoice: Concept, Methodology, and Use for Participatory  
55  
56 738 Needs Assessment. *Heal Educ Behav* 1997;**24**:369–87.  
57  
58 739 doi:10.1177/109019819702400309  
59  
60

1  
2  
3  
4  
5  
6  
7  
8  
9  
10  
11  
12  
13  
14  
15  
16  
17  
18  
19  
20  
21  
22  
23  
24  
25  
26  
27  
28  
29  
30  
31  
32  
33  
34  
35  
36  
37  
38  
39  
40  
41  
42  
43  
44  
45  
46  
47  
48  
49  
50  
51  
52  
53  
54  
55  
56  
57  
58  
59  
60

- 740 53 Catalani C, Minkler M. Photovoice: A review of the literature in health and public health. *Heal Educ Behav* 2010;**37**:424–51. doi:10.1177/1090198109342084
- 741
- 742 54 Budig K, Diez J, Conde P, *et al*. Photovoice and empowerment: Evaluating the transformative potential of a participatory action research project. *BMC Public Health* 2018;**18**:1–9. doi:10.1186/s12889-018-5335-7
- 743
- 744
- 745 55 Black GF, Davies A, Iskander D, *et al*. Reflections on the ethics of participatory visual methods to engage communities in global health research. *Glob Bioeth* 2018;**29**:22–38. doi:10.1080/11287462.2017.1415722
- 746
- 747
- 748 56 Naserrudin NA, Hod R, *et al*. Expert Consensus on a Proposed Study Framework to Explore Factors Influencing Plasmodium knowlesi Malaria Preventive Behavior: A Modified Delphi Method Protocol. *Int J Environ Res Public Heal* 2022, Vol 19, Page 4141 2022;**19**:4141. doi:10.3390/IJERPH19074141
- 749
- 750
- 751
- 752 57 Braun V, Clarke V. *Thematic Analysis: A Practical Guide*. 2021. [https://books.google.com.my/books?id=mToqEAAAQBAJ&printsec=frontcover&source=gbgbs\\_ge\\_summary\\_r&cad=0#v=onepage&q&f=false](https://books.google.com.my/books?id=mToqEAAAQBAJ&printsec=frontcover&source=gbgbs_ge_summary_r&cad=0#v=onepage&q&f=false) (accessed 10 September 2021).
- 753
- 754
- 755
- 756 58. Khan M, Manderson L. Focus groups in tropical diseases research. *Health Policy Plan*. 1992;**7**: 56–66. doi:10.1093/heapol/7.1.56
- 757
- 758 59 Marshall MN. The key informant technique. *Fam Pract* 1996;**13**:92–7. doi:10.1093/fampra/13.1.92
- 759
- 760 60 McAreavey R, Das C. A Delicate Balancing Act: Negotiating with Gatekeepers for Ethical Research When Researching Minority Communities. *Int J Qual methods* 2013;**12**:113–31. doi:10.1177/160940691301200102
- 761
- 762
- 763 61 Lincoln YS, Guba EG. *Naturalistic inquiry*. Newbury park, CA: SAGE (1985).
- 764 62 Nykiforuk IJ, Vallianatos H, Nieuwendyk LM. Photovoice as a Method for Revealing

- 1  
2  
3 765 Community Perceptions of the Built and Social Environment. *Int J Qual methods*  
4  
5  
6 766 2011;**10**:103. doi:10.1177/160940691101000201  
7  
8 767 63 O.Latz A. Photovoice Research in Education and Beyond: A practical guide from  
9  
10 768 theory and exhibition. New York, NY: Routledge (2017)  
11  
12 769 64 Fereday J, Adelaide N, Australia S, *et al*. Demonstrating Rigor Using Thematic  
13  
14  
15 770 Analysis: A Hybrid Approach of Inductive and Deductive Coding and Theme  
16  
17 771 Development. *Int J Qual methods* 2006;5:80-92 . doi:10.1177/160940690600500107  
18  
19 772  
20  
21  
22 773  
23  
24 774  
25

26 775 **Figure titles**

27  
28 776 **Figure 1. The study area**

29  
30 777 **Figure 2. The study flowchart**

31  
32 778 **Figure 3. The study framework**

33  
34 779 **Figure 4. The photovoice recruitment pamphlet in the Malay language**  
35  
36  
37  
38 780  
39  
40  
41  
42  
43  
44  
45  
46  
47  
48  
49  
50  
51  
52  
53  
54  
55  
56  
57  
58  
59  
60

Figure 1. The study area

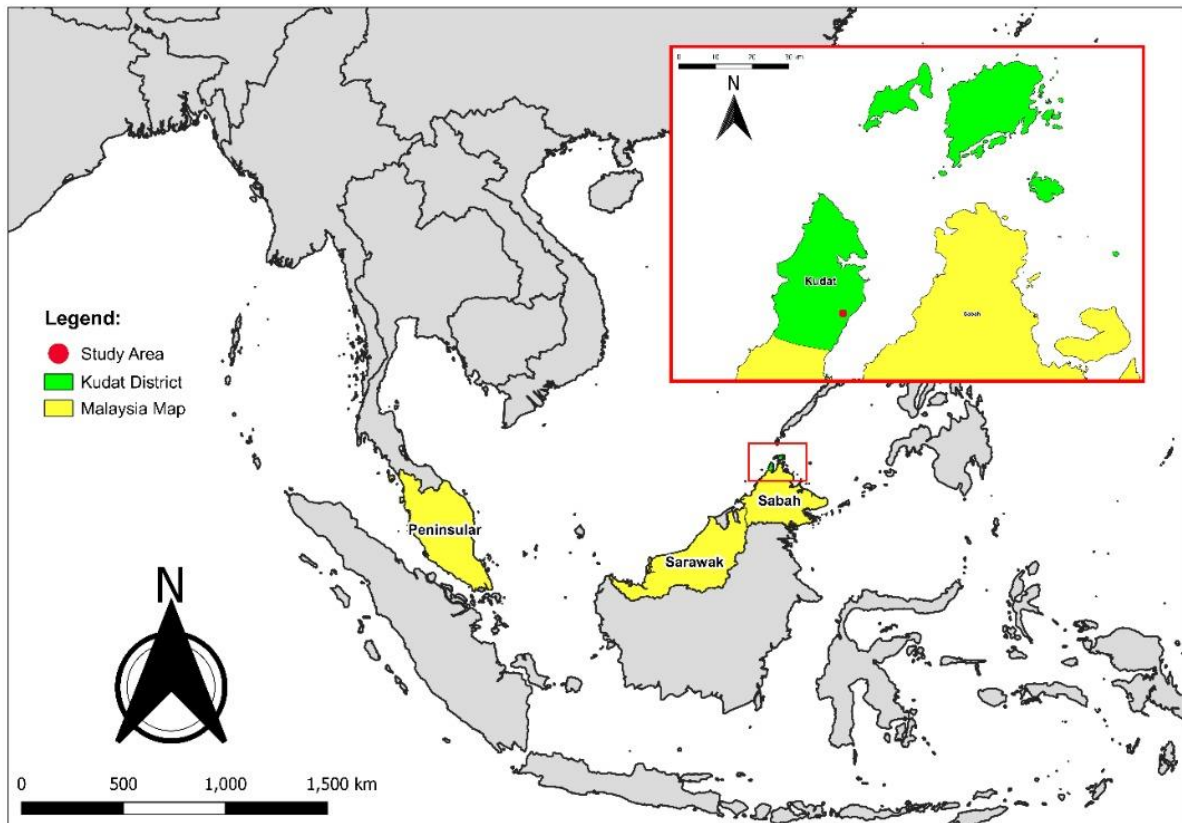

Review only



1  
2  
3  
4  
5  
6  
7  
8  
9  
10  
11  
12  
13  
14  
15  
16  
17  
18  
19  
20  
21  
22  
23  
24  
25  
26  
27  
28  
29  
30  
31  
32  
33  
34  
35  
36  
37  
38  
39  
40  
41  
42  
43  
44  
45  
46  
47  
48  
49  
50  
51  
52  
53  
54  
55  
56  
57  
58  
59  
60

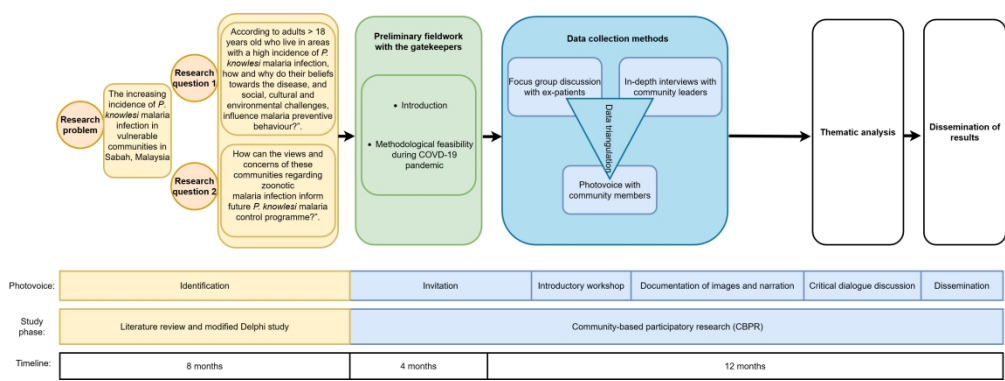

Figure 2. The study flowchart

1204x442mm (72 x 72 DPI)



Figure 3. The study framework

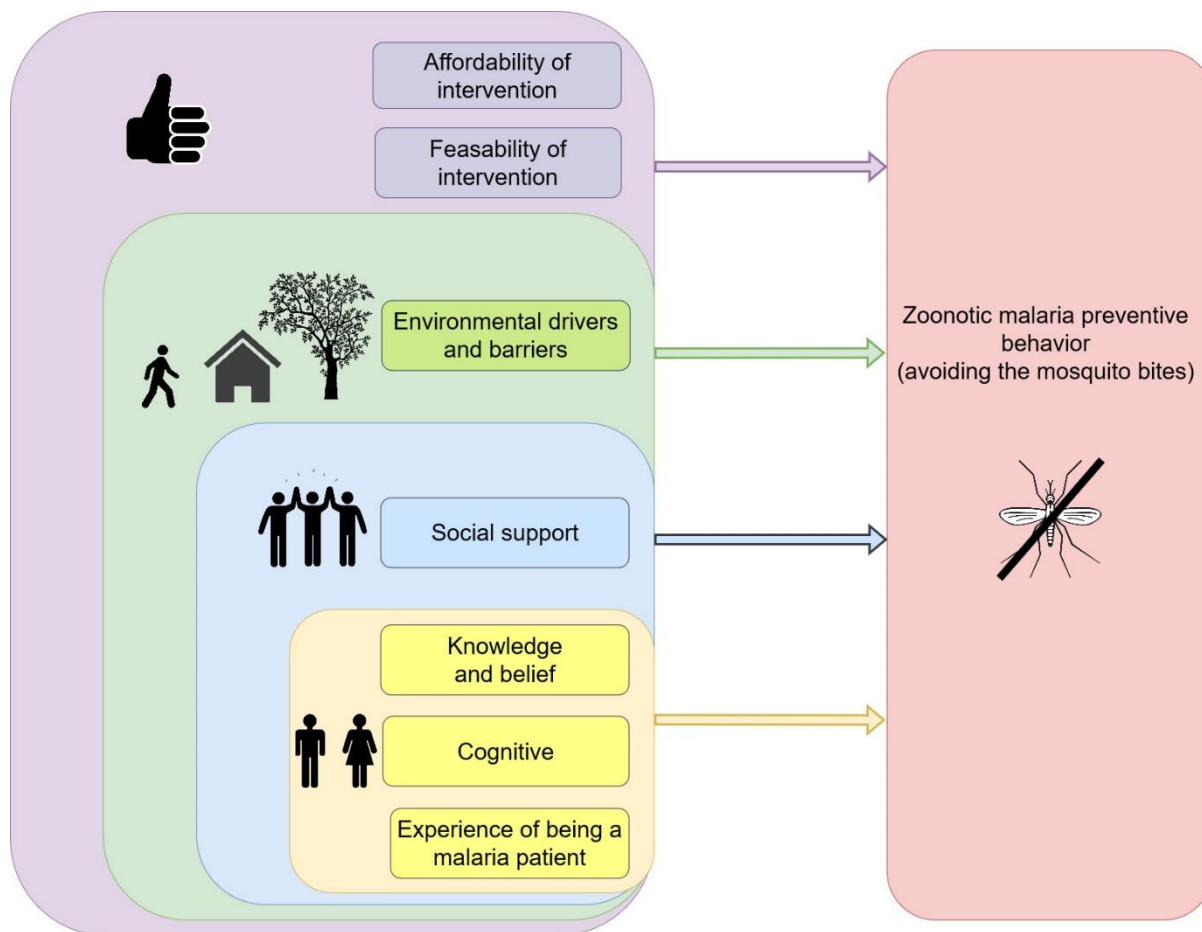

Review only

Figure 4. The photovoice recruitment pamphlet in the Malay language

1  
2  
3  
4  
5  
6  
7  
8  
9  
10  
11  
12  
13  
14  
15  
16  
17  
18  
19  
20  
21  
22  
23  
24  
25  
26  
27  
28  
29  
30  
31  
32  
33  
34  
35  
36  
37  
38  
39  
40  
41  
42  
43  
44  
45  
46  
47  
48  
49  
50  
51  
52  
53  
54  
55  
56  
57  
58  
59  
60



**DARI SUDUT MATA ANDA**

# **MALARIA MONYET?**

**ADAKAH ANDA BERMINAT UNTUK BERKONGSI PANDANGAN?**

- **BERUMUR >18 TAHUN**
- **PENDUDUK TETAP KAMPUNG DI KUDAT, SABAH**
- **MEMPUNYAI ALAT UNTUK MENGAMBIL GAMBAR (TELEFON, KAMERA, DLL)**
- **MEMPUNYAI TALIAN INTERNET**
- **MEMAHAMI DAN BERTUTUR DALAM BAHASA MELAYU / INGGERIS**
- **MEMBERI KERJASAMA DALAM SESI PERBINCANGAN**

**LOKASI, TARIKH DAN MASA AKAN DIMAKLUMKAN.**

**JIKA BERMINAT, SILA HUBUNGI DR NURUL ATHIRAH (0199883361 ATAU DRATHIRAH85@GMAIL.COM)**
